# Supplementary material for: A Metagenomic Investigation of the Viruses Associated with Shiraz Disease in Australia
Source: MDPI journal article supplement (doi:10.3390/v15030774), 2023-03-17
Supplement: s1 [file s1]

## Supplementary Material

**Table S1.** Sampling time, numbers of canes or petioles sampled per grapevine, tissue type and sample codes for samples used in the reverse transcription polymerase chain reaction (RT-PCR) and metagenomics high throughput sequencing (Meta-HTS) experiments. Samples were collected from four vineyards between May 2018 and December 2020.

| Sampling time                 | Vineyard locations <sup>3</sup> | tissue type             | No. of canes/petioles per grapevine | Total no. of samples | Sample code                                                                            |
|-------------------------------|---------------------------------|-------------------------|-------------------------------------|----------------------|----------------------------------------------------------------------------------------|
| May to July 2018 <sup>1</sup> | WIL, LC and BV                  | autumn or dormant canes | 3                                   | 66                   | WIL1-30, LC1-30 and BV1-6                                                              |
| March 2019 <sup>1,2</sup>     | WIL, LC and BV                  | petioles                | 5                                   | 66                   | WIL1-30, LC1-30 and BV1-6                                                              |
| August 2020 <sup>1,2</sup>    | WIL                             | dormant canes           | 5                                   | 50                   | WIL31-81 (exclude WIL46)                                                               |
| December 2020 <sup>1,2</sup>  | WIL and CV                      | petioles                | 5                                   | 9                    | Cabw1, 2, 11 and 12, Merlot1 (WIL), Shiraz_OR_P5 and P6, CabSA125_R3V30 and R3V44 (CV) |

<sup>1</sup> Samples for RT-PCR virus detection.

<sup>2</sup> Samples for metagenomics high throughput sequencing.

<sup>3</sup> WIL = Willunga, LC = Langhorne Creek, BV = Barossa Valley, CV= Coombe's Vineyard. All grapevines listed are var. Shiraz except Cabw = Cabernet Sauvignon clone SA125 from Willunga and CabSA125 = Cabernet Sauvignon clone SA125 from Coombe's Vineyard.

**Table S2.** Primers sequences for virus detection using endpoint RT-PCR.

| Virus | Primers        | Primer sequence (5'- 3')                     | Annealing Temperature (°C) | Gene        | Amplicon size | Reference |
|-------|----------------|----------------------------------------------|----------------------------|-------------|---------------|-----------|
| GVA   | Ah587<br>Ac995 | GACAAATGGCACACTACG<br>AAGCCTGACCTAGTCATCTTGG | 56                         | CP          | 430bp         | [52]      |
| GVA   | H7038<br>C7273 | AGGTCCACGTTTGCTAAG<br>CATCGTCTGAGGTTTCTACTAT | 56                         | RNA binding | 273bp         | [33]      |

|                                  |                                                        |                                                             |    |                        |        |                                                  |
|----------------------------------|--------------------------------------------------------|-------------------------------------------------------------|----|------------------------|--------|--------------------------------------------------|
| GVA                              | GVAgroupIIIF <sup>2</sup><br>GVAgroupIIIR <sup>2</sup> | GGAGAGGTAGATATAGTAGGACC<br>CTTCTTGCAGAGTCAAGGTC             | 56 | CP                     | 315    | Modified from primer<br>pair 6591F/6906R<br>[33] |
| GLRaV-1                          | p35LR17589f<br>p35LR17763r                             | AATCCTATGCGTCAGTATGC<br>TGGCATCGTTGCTAAATTGAG               | 56 | CP                     | 174 bp | [53]                                             |
| GLRaV-2                          | LR2-U2<br>LR2-L2                                       | ATAATTCGGCGTACATCCCCACTT<br>GCCCTCCGCGCAACTAATGACAG         | 56 | HSP 70-like<br>protein | 332 bp | [54]                                             |
| GLRaV-3                          | HSP70<br>HSP7070                                       | GGGTCAAGTGCTCTAGTTAAGGTCA<br>AAAGTGTCCACCAGTCTCAGTCC        | 58 | HSP 70-like<br>protein | 167bp  | [44]                                             |
| GLRaV-3                          | LR3P-H420<br>LR3P-C629                                 | GATTTAAGCGCGTTTTTCAGGAC<br>CGGCACGATCGTACTTTCTAA            | 58 | Hsp90-like<br>protein  | 210 bp | [55]                                             |
| GLRaV-4<br>strain 4              | LR4CP298F<br>LR4CP298R                                 | CCTGTTACGCCGCCTACTAC<br>GGTGCTTGTCACCTCTCCGAA               | 56 | CP                     | 298bp  | This study                                       |
| GLRaV-4<br>strain 5 <sup>1</sup> | LR5-1F<br>LR5-1R                                       | CCCGTGATACAAGGTAGGACA<br>CAGACTTCACCTCCTGTTC                | 55 | 3'-URT                 | 690bp  | [56]                                             |
| GLRaV-4<br>strain 6              | LR6_CPF<br>LR6_CPR                                     | AAATTCCGCGCCTMTTCAATG<br>ATGTCTGGGGCCACCTTAGT               | 58 | CP                     | 563bp  | This study                                       |
| GLRaV-4<br>strain 9              | LR9F<br>LR9R                                           | ACA GTG GTC GGC ATA AGA AAA G<br>ACACAA ACA TGC AGG CCA AAG | 56 | Hsp90-like<br>protein  | 250bp  | [57]                                             |
| GRVfV                            | GRVfV237F<br>GRVfV237R                                 | ACTGAGCTACAAGGTGAATTGC<br>AGCAACCCACTGGAAGGGGATGG           | 60 | Polyprotein            | 237bp  | [58]                                             |
| GRSPaV                           | RSP48<br>RSP49                                         | AGCTGGGATTATAAGGGAGGT<br>CCAGCCGTTCCACCACTAAT               | 56 | CP                     | 330bp  | [59]                                             |
| GVB                              | H6980<br>C7439                                         | GTGCTAAGAACGTCTTCACAGC<br>ATCAGCAAACACGCTTGAACCG            | 56 | RNA<br>binding         | 460bp  | [60]                                             |
| RubiscoL<br>internal<br>control  | RBCL-H535<br>RBCL-C705                                 | CTTTCCAAGGCCCGCCTCA<br>CATCATCTTTGGTAAAATCAAGTCCA           | 56 | N/A                    | 171bp  | [23]                                             |

<sup>1</sup> For Sanger sequencing only.

<sup>2</sup> Grapevine virus A phylogroup III specific RT-PCR assay.

**Table S3.** Symptom observation and the viruses detected in Shiraz grapevines at the Willunga, Langhorne Creek, Barossa, and Adelaide University (Coombe's) vineyards using endpoint RT-PCR.

| Location | Symptoms     | Variety and Clone        | Virus detected by RT-PCR#                    | Number of grapevines with given virus |
|----------|--------------|--------------------------|----------------------------------------------|---------------------------------------|
| Willunga | Asymptomatic | Shiraz BVRC12            | GRSPaV                                       | 1                                     |
|          |              |                          | GRVFV, GRSPaV                                | 3                                     |
|          |              |                          | GLRaV-4/6, GRSPaV                            | 1                                     |
|          |              |                          | GLRaV-4/9, GRSPaV                            | 2                                     |
|          |              |                          | GLRaV-4/6, GRVFV, GRSPaV                     | 10                                    |
|          |              |                          | GLRaV-4/9, GRVFV, GRSPaV                     | 7                                     |
|          |              |                          | GLRaV-4/6, GLRaV-4/9, GRVFV, GRSPaV          | 5                                     |
|          |              |                          | GLRaV-3, GRSPaV                              | 1                                     |
|          | LRD          | Shiraz BVRC12            | GLRaV-3, GLRaV-4/6, GRSPaV                   | 1                                     |
|          |              |                          | GLRaV-3, GRVFV, GRSPaV                       | 7                                     |
|          |              |                          | GLRaV-3, GLRaV-4/9, GRVFV, GRSPaV            | 10                                    |
|          |              |                          | GLRaV-3, GLRaV-4/6, GRVFV, GRSPaV            | 4                                     |
|          |              |                          | GLRaV-3, GLRaV-4/6, GLRaV-4/9, GRVFV, GRSPaV | 12                                    |
|          |              | Cabernet Sauvignon SA125 | GVA, GLRaV-3, GLRaV-4/9, GRSPaV              | 4                                     |
|          | SD           | Shiraz BVRC12            | GVA, GLRaV-3, GRSPaV                         | 2                                     |
|          |              |                          | GVA, GLRaV-3, GRVFV, GRSPaV                  | 5                                     |
|          |              |                          | GVA, GLRaV-4/9, GRVFV, GRSPaV                | 1                                     |

|                    |              |                                        |                               |    |
|--------------------|--------------|----------------------------------------|-------------------------------|----|
|                    |              | GVA, GLRaV-3, GLRaV-4/9, GRVfV, GRSPaV |                               | 8  |
|                    |              | Merlot                                 | GVA, GLRaV-3, GRSPaV          | 1  |
| Langhorne<br>Creek | Asymptomatic | Shiraz                                 | GRSPaV                        | 14 |
|                    | SD           |                                        | GRVfV, GRSPaV                 | 1  |
|                    |              |                                        | GVA, GRSPaV                   | 5  |
|                    |              |                                        | GVA, GLRaV-4/9                | 7  |
|                    |              |                                        | GVA, GLRaV-4/9, GRVfV, GRSPaV | 2  |
|                    |              |                                        | GVA, GLRaV-4/6, GRVfV, GRSPaV | 1  |
| Barossa            | Mild LRD     | heritage Shiraz                        | GVA*, GLRaV-1, GRSPaV         | 3  |
|                    | Asymptomatic |                                        | GRSPaV                        | 3  |
| Coombe's           | Mild LRD     | Cabernet Sauvignon SA125               | GVA, GLRaV-4/9, GRSPaV        | 2  |
|                    | Asymptomatic | Shiraz BVRC12                          | GRVfV, GRSPaV                 | 2  |

\*Grapevine virus A detected in the grapevine with mild leafroll disease symptoms in Barossa valley.

#GRSPaV = grapevine rupestris stem pitting-associated virus, GRVFFV = grapevine rupestris vein feathering virus, GLRaV-1, -3 = grapevine leafroll-associated virus 1, and 3, GLRaV-4/6, -4/9 = grapevine leafroll-associated virus 4 strains 6 and 9, GVA = grapevine virus A.

**Table S4.** Virus detection of samples tested by RT-PCR but not tested by high throughput sequencing, and the symptoms that were observed.

| Sample ID <sup>1</sup> | Virus status by RT-PCR <sup>2</sup> | Symptoms <sup>3</sup> |
|------------------------|-------------------------------------|-----------------------|
| WIL16                  | GRVFFV, GRSPaV                      | Asymptomatic          |
| WIL18                  | GLRaV-4/6, GRVFFV, GRSPaV           | Asymptomatic          |
| WIL20                  | GLRaV-4/6, GRVFFV, GRSPaV           | Asymptomatic          |
| WIL21                  | GLRaV-4/6, GRVFFV, GRSPaV           | Asymptomatic          |
| WIL23                  | GLRaV-4/6, GRVFFV, GRSPaV           | Asymptomatic          |
| WIL25                  | GLRaV-4/6, GRVFFV, GRSPaV           | Asymptomatic          |
| WIL26                  | GRVFFV, GRSPaV                      | Asymptomatic          |

|       |                                                     |              |
|-------|-----------------------------------------------------|--------------|
| WIL27 | GLRaV-4/6, GRVFFV, GRSPaV                           | Asymptomatic |
| WIL28 | GLRaV-4/6, GRSPaV                                   | Asymptomatic |
| WIL29 | GLRaV-4/6, GLRaV-4/9, GRVFFV, GRSPaV                | Asymptomatic |
| WIL30 | GLRaV-4/6, GLRaV-4/9, GRVFFV, GRSPaV                | Asymptomatic |
| WIL31 | GVA#, GLRaV-4/9, GRVFFV, GRSPaV                     | Asymptomatic |
| WIL32 | GVA*, GLRaV-4/9, GRVFFV, GRSPaV                     | SD           |
| WIL33 | GVA#, GLRaV-3, GLRaV-4/9, GRVFFV, GRSPaV            | LRD          |
| WIL34 | GVA#, GLRaV-4/9, GRVFFV, GRSPaV                     | Asymptomatic |
| WIL35 | GVA#, GLRaV-3, GRVFFV, GRSPaV                       | LRD          |
| WIL36 | GLRaV-3, GRVFFV, GRSPaV                             | LRD          |
| WIL37 | GLRaV-3, GRVFFV, GRSPaV                             | LRD          |
| WIL38 | GVA#, GLRaV-3, GLRaV-4/6, GLRaV-4/9, GRVFFV, GRSPaV | LRD          |
| WIL39 | GVA#, GLRaV-4/6, GLRaV-4/9, GRVFFV, GRSPaV          | Asymptomatic |
| WIL40 | GVA#, GLRaV-3, GLRaV-4/6, GLRaV-4/9, GRVFFV, GRSPaV | LRD          |
| WIL41 | GLRaV-3, GLRaV-4/6, GLRaV-4/9, GRVFFV, GRSPaV       | LRD          |
| WIL42 | GLRaV-3, GLRaV-4/6, GRVFFV, GRSPaV                  | LRD          |
| WIL43 | GVA#, GLRaV-3, GLRaV-4/6, GRVFFV, GRSPaV            | LRD          |
| WIL44 | GLRaV-4/9, GRVFFV, GRSPaV                           | Asymptomatic |
| WIL45 | GVA#, GLRaV-4/9, GRVFFV, GRSPaV                     | Asymptomatic |
| WIL51 | GVA*, GLRaV-3, GRVFFV, GRSPaV                       | SD           |
| WIL52 | GVA*, GLRaV-3, GRVFFV, GRSPaV                       | SD           |
| WIL54 | GLRaV-3, GLRaV-4/9, GRVFFV, GRSPaV                  | LRD          |
| WIL55 | GLRaV-3, GLRaV-4/9, GRVFFV, GRSPaV                  | LRD          |
| WIL56 | GVA#, GLRaV-4/9, GRVFFV, GRSPaV                     | Asymptomatic |
| WIL57 | GLRaV-4/9, GRSPaV                                   | Asymptomatic |
| WIL58 | GLRaV-4/9, GRSPaV                                   | Asymptomatic |
| WIL59 | GLRaV-4/9, GRVFFV, GRSPaV                           | Asymptomatic |

|       |                                                        |              |
|-------|--------------------------------------------------------|--------------|
| WIL60 | GLRaV-3, GLRaV-4/9, GRVFFV, GRSPaV                     | LRD          |
| WIL61 | GLRaV-3, GLRaV-4/9, GRVFFV, GRSPaV                     | LRD          |
| WIL62 | GVA#, GLRaV-3, GLRaV-4/9, GRVFFV, GRSPaV               | LRD          |
| WIL63 | GLRaV-3, GLRaV-4/9, GRVFFV, GRSPaV                     | LRD          |
| WIL64 | GLRaV-3, GLRaV-4/9, GRVFFV, GRSPaV                     | LRD          |
| WIL65 | GLRaV-3, GRVFFV, GRSPaV                                | LRD          |
| WIL66 | GLRaV-3, GLRaV-4/6, GLRaV-4/9, GRVFFV, GRSPaV          | LRD          |
| WIL67 | GVA#, GLRaV-3, GLRaV-4/6, GLRaV-4/9, GRVFFV,<br>GRSPaV | LRD          |
| WIL68 | GVA#, GLRaV-3, GLRaV-4/6, GLRaV-4/9, GRVFFV,<br>GRSPaV | LRD          |
| WIL69 | GLRaV-3, GLRaV-4/6, GLRaV-4/9, GRVFFV, GRSPaV          | LRD          |
| WIL70 | GLRaV-3, GLRaV-4/6, GLRaV-4/9, GRVFFV, GRSPaV          | LRD          |
| WIL71 | GLRaV-4/6, GLRaV-4/9, GRVFFV, GRSPaV                   | Asymptomatic |
| WIL72 | GLRaV-4/6, GLRaV-4/9, GRVFFV, GRSPaV                   | Asymptomatic |
| WIL73 | GLRaV-3, GLRaV-4/6, GRVFFV, GRSPaV                     | LRD          |
| WIL74 | GLRaV-4/6, GRVFFV, GRSPaV                              | Asymptomatic |
| WIL75 | GLRaV-4/6, GRVFFV, GRSPaV                              | Asymptomatic |
| WIL76 | GLRaV-4/9, GRVFFV, GRSPaV                              | Asymptomatic |
| WIL77 | GLRaV-3, GRVFFV, GRSPaV                                | LRD          |
| WIL78 | GLRaV-3, GLRaV-4/6, GRSPaV                             | LRD          |
| WIL79 | GLRaV-3, GRVFFV, GRSPaV                                | LRD          |
| WIL80 | GLRaV-3, GRSPaV                                        | LRD          |
| WIL81 | GLRaV-3, GRVFFV, GRSPaV                                | LRD          |
| LC1   | GVA*, GLRaV-4/9, GRVFFV, GRSPaV                        | SD           |
| LC2   | GVA*, GLRaV-4/9, GRSPaV                                | SD           |
| LC3   | GVA*, GLRaV-4/6, GRVFFV, GRSPaV                        | SD           |
| LC4   | GVA*, GRSPaV                                           | SD           |
| LC8   | GVA*, GLRaV-4/9, GRSPaV                                | SD           |

|              |                                 |              |
|--------------|---------------------------------|--------------|
| LC15         | GVA*, GLRaV-4/9, GRVFFV, GRSPaV | SD           |
| LC17         | GRSPaV                          | Asymptomatic |
| LC19 to LC30 | GRSPaV                          | Asymptomatic |
| BV2          | GVA*, GLRaV-1, GRSPaV           | Mild LRD     |
| BV4          | GRSPaV                          | Asymptomatic |
| BV5          | GRSPaV                          | Asymptomatic |

<sup>1</sup> WIL = Willunga, LC = Langhorne Creek, BV = Barossa Valley. All grapevines listed are var. Shiraz

<sup>2</sup> GRSPaV = grapevine rupestris stem pitting-associated virus, GRVFFV = grapevine rupestris vein feathering virus, GLRaV-1, -3 = grapevine leafroll-associated virus 1, and 3, GLRaV-4/6, -4/9 = grapevine leafroll-associated virus 4 strain 6 and 9, GVA = grapevine virus A.

<sup>3</sup> SD = Shiraz disease, LRD = leafroll disease (LRD)

\*GVA positives by primer pairs Ah587/Ac995 and H7038/C7273.

# GVA positives by primer pairs GVAgroupIIIF/R.

**Table S5.** Virus status detected by RT-PCR and metagenomic high-throughput sequencing (Meta-HTS) and the GVA phylogroup that was identified.

| Sample ID <sup>1</sup> | Symptoms <sup>2</sup> | Virus status by RT-PCR <sup>4</sup>       | Virus status by Meta-HTS <sup>4</sup>              | Phylo groups <sup>3</sup>              |
|------------------------|-----------------------|-------------------------------------------|----------------------------------------------------|----------------------------------------|
| WIL1                   | SD                    | GVA*#, GLRaV-3, GLRaV-4/9, GRVFFV, GRSPaV | GVA, GLRaV-4/9, GRSPaV, GRVFFV                     | II <sup>3a</sup><br>&III <sup>3a</sup> |
| WIL2                   | SD                    | GVA*#, GLRaV-3, GLRaV-4/9, GRVFFV, GRSPaV | GVA, GLRaV-4/9, GRVFFV, GRSPaV                     | II <sup>3a</sup><br>&III <sup>3a</sup> |
| WIL3                   | SD                    | GVA*#, GLRaV-3, GLRaV-4/9, GRVFFV, GRSPaV | GVA, GLRaV-4/9, GRVFFV, GRSPaV                     | II <sup>3a</sup><br>&III <sup>3a</sup> |
| WIL4                   | SD                    | GVA*, GLRaV-3, GLRaV-4/9, GRSPaV, GRVFFV  | GVA, GLRaV-3, GLRaV-4/9, GRVFFV, GRSPaV            | II <sup>3a</sup>                       |
| WIL5                   | SD                    | GVA*, GLRaV-3, GLRaV-4/9, GRVFFV, GRSPaV  | GVA, GLRaV-3, GLRaV-4/9, GRVFFV, GRSPaV            | II <sup>3a</sup>                       |
| WIL6                   | SD                    | GVA*, GLRaV-3, GLRaV-4/9, GRVFFV, GRSPaV  | GVA, GLRaV-3, GLRaV-4/9, GRVFFV, GRSPaV            | II <sup>3a</sup>                       |
| WIL7                   | SD                    | GVA*, GLRaV-3, GLRaV-4/9, GRVFFV, GRSPaV  | GVA, GLRaV-3, GLRaV-4/9, GRVFFV, GRSPaV            | II <sup>3a</sup>                       |
| WIL8                   | SD                    | GVA*#, GLRaV-3, GLRaV-4/9, GRSPaV, GRVFFV | GVA, GLRaV-3, GLRaV-4/9, GRVFFV, GRSPaV            | II <sup>3a</sup><br>&III <sup>3a</sup> |
| WIL9                   | LRD                   | GVA#, GLRaV-3, GLRaV-4/9, GRVFFV, GRSPaV  | GVA, GLRaV-3, GLRaV-4/6, GLRaV-4/9, GRVFFV, GRSPaV | III <sup>3a</sup>                      |

|       |              |                                               |                                                        |                   |
|-------|--------------|-----------------------------------------------|--------------------------------------------------------|-------------------|
| WIL10 | LRD          | GVA#,GLRaV-3,GLRaV-4/6,GLRaV-4/9,GRVFV,GRSPaV | GVA, GLRaV-3, GLRaV-4/6, GLRaV-4/9,GRVFV,GRSPaV        | III <sup>3a</sup> |
| WIL11 | LRD          | GVA#,GLRaV-3,GLRaV-4/6,GLRaV-4/9,GRVFV,GRSPaV | GVA, GLRaV-3, GLRaV-4/6, GLRaV-4/9, GRVFV,GRSPaV       | III <sup>3a</sup> |
| WIL12 | LRD          | GVA#,GLRaV-3,GLRaV-4/6,GLRaV-4/9,GRVFV,GRSPaV | GVA, GLRaV-3, GLRaV-4/6, GLRaV-4/9,GRVFV,GRSPaV        | III <sup>3a</sup> |
| WIL13 | LRD          | GLRaV-3, GLRaV-4/9,GRVFV,GRSPaV               | GVA, GLRaV-3, GLRaV-4/5, GLRaV-4/9, GRVFV,GRSPaV       | III <sup>3a</sup> |
| WIL14 | LRD          | GLRaV-3,GLRaV-4/6,GLRaV-4/9,GRVFV,GRSPaV      | GLRaV-3, GLRaV-4/5, GLRaV-4/6, GLRaV-4/9, GRVFV,GRSPaV | Neg               |
| WIL15 | LRD          | GLRaV-3, GLRaV-4/6,GRVFV,GRSPaV               | GLRaV-3, GLRaV-4/5, GLRaV-4/6, GRVFV, GRSPaV           | Neg               |
| WIL17 | Asymptomatic | GRVFV, GRSPaV                                 | GRVFV, GRSPaV                                          | Neg               |
| WIL19 | Asymptomatic | GLRaV-4/6,GRVFV,GRSPaV                        | GLRaV-4/6, GRVFV,GRSPaV                                | Neg               |
| WIL22 | Asymptomatic | GLRaV-4/6,GRVFV,GRSPaV                        | GLRaV-4/6, GRVFV,GRSPaV                                | Neg               |
| WIL24 | Asymptomatic | GRSPaV                                        | GLRaV-4/6, GRVFV,GRSPaV                                | Neg               |
| WIL47 | SD           | GVA*,GLRaV-3,GRVFV,GRSPaV                     | GVA, GLRaV-3, GRVFV, GRSPaV                            | III <sup>3a</sup> |
| WIL48 | SD           | GVA*,GLRaV-3,GRVFV,GRSPaV                     | GVA, GLRaV-3, GRSPaV                                   | II <sup>3a</sup>  |
| WIL49 | SD           | GVA*,GLRaV-3,GRVFV,GRSPaV                     | GVA, GLRaV-3, GRVFV, GRSPaV                            | II <sup>3a</sup>  |
| WIL50 | SD           | GVA*,GLRaV-3, GRSPaV                          | GVA, GLRaV-3, GRSPaV                                   | II <sup>3b</sup>  |
| WIL53 | SD           | GVA*, GLRaV-3,GRSPaV                          | GVA, GLRaV-3, GRVFV, GRSPaV                            | II <sup>3a</sup>  |
| LC5   | SD           | GVA*, GRSPaV                                  | GVA, GLRaV-4/9, GRSPaV                                 | II <sup>3a</sup>  |
| LC6   | SD           | GVA*, GRSPaV                                  | GVA, GLRaV-4/9, GRSPaV                                 | II <sup>3a</sup>  |
| LC7   | SD           | GVA*,GRSPaV                                   | GVA, GLRaV-4/9, GRSPaV                                 | II <sup>3a</sup>  |
| LC9   | SD           | GVA*,GRSPaV                                   | GVA, GLRaV-4/9, GRSPaV                                 | II <sup>3a</sup>  |
| LC10  | SD           | GVA*,GLRaV-4/9, GRSPaV,                       | GVA, GLRaV-4/9, GRSPaV                                 | II <sup>3a</sup>  |

|              |              |                                   |                                              |                                                 |
|--------------|--------------|-----------------------------------|----------------------------------------------|-------------------------------------------------|
| LC11         | SD           | GVA*,GLRaV-4/9, GRSPaV,           | GVA, GLRaV-4/9, GRVfV, GRSPaV                | II <sup>3a</sup>                                |
| LC12         | SD           | GVA*,GLRaV-4/9, GRSPaV,           | GVA, GLRaV-4/9, GRSPaV                       | II <sup>3b</sup>                                |
| LC13         | SD           | GVA*,GLRaV-4/9, GRSPaV            | GVA, GLRaV-4/9, GRSPaV                       | II <sup>3a</sup>                                |
| LC14         | SD           | GVA*,GLRaV-4/9, GRSPaV            | GVA, GLRaV-4/9, GRSPaV                       | II <sup>3a</sup>                                |
| LC16         | Asymptomatic | GRVfV, GRSPaV                     | GRVfV,GRSPaV                                 | Neg                                             |
| LC18         | Asymptomatic | GRSPaV                            | GRVfV, GRSPaV                                | Neg                                             |
| LC20         | Asymptomatic | GRSPaV                            | GRSPaV                                       | Neg                                             |
| LC24         | Asymptomatic | GRSPaV                            | GRSPaV                                       | Neg                                             |
| LC27         | Asymptomatic | GRSPaV                            | GRVfV, GRSPaV                                | Neg                                             |
| BV1          | Mild LRD     | GVA*, GLRaV-1, GRSPaV             | GVA, GLRaV-1, GRVfV, GRSPaV                  | I <sup>3a</sup>                                 |
| BV3          | Mild LRD     | GVA*, GLRaV-1, GRSPaV             | GVA, GLRaV-1, GRSPaV                         | I <sup>3b</sup>                                 |
| BV6          | Asymptomatic | GRSPaV                            | GRVfV, GRSPaV                                | Neg                                             |
| Cabw1        | LRD          | GVA*#, GLRaV-3, GLRaV-4/9, GRSPaV | GVA, GVf, GLRaV-3, GLRaV-4/9, GRSPaV, GRGV   | II <sup>3b</sup> &III <sup>3</sup> <sub>a</sub> |
| Cabw2        | LRD          | GVA*#, GLRaV-3, GLRaV-4/9, GRSPaV | GVA, GVf, GLRaV-3, GLRaV-4/9, GRSPaV, GRGV   | II <sup>3b</sup> &III <sup>3</sup> <sub>b</sub> |
| Cabw11       | LRD          | GVA*, GLRaV-3, GLRaV-4/9, GRSPaV  | GVA, GLRaV-3, GLRaV-4/9, GRSPaV, GRVfV, GRGV | II <sup>3a</sup>                                |
| Cabw12       | LRD          | GVA*#, GLRaV-3, GLRaV-4/9, GRSPaV | GVA, GLRaV-3, GLRaV-4/9, GRSPaV, GRVfV, GRGV | II <sup>3a</sup> &III <sup>3</sup> <sub>b</sub> |
| Melort1      | SD           | GVA*#, GLRaV-3, GRSPaV            | GVA, GLRaV-3, GLRaV-4/9, GRSPaV              | II <sup>3b</sup> &III <sup>3</sup> <sub>b</sub> |
| Shiraz_OR_P5 | Asymptomatic | GRVfV, GRSPaV                     | GRVfV, GRSPaV                                | Neg                                             |

| Shiraz_OR_P6       | Asymptomatic | GRVFFV, GRSPaV            | GRVFFV, GRSPaV               | Neg                                             |
|--------------------|--------------|---------------------------|------------------------------|-------------------------------------------------|
| CabSA125_R3V<br>30 | LRD          | GVA*#, GLRaV-4/9, GRSPaV, | GVA, GLRaV-4/9, GRSPaV, GRGV | II <sup>3b</sup> &III <sup>3</sup> <sub>b</sub> |
| CabSA125_R3V<br>44 | LRD          | GVA*#, GLRaV-4/9, GRSPaV  | GVA, GLRaV-4/9, GRSPaV       | II <sup>3b</sup> &III <sup>3</sup> <sub>b</sub> |

<sup>1</sup> WIL = Willunga, LC = Langhorne Creek, BV = Barossa Valley, CV= Coombe's Vineyard. All grapevines listed are var. Shiraz except Cabw = Cabernet Sauvignon from Willunga and CabSA125 = Cabernet Sauvignon clone SA125 from Coombe's Vineyard, Merlot = Merlot from Willunga.

<sup>2</sup> SD = Shiraz disease, LRD = leafroll disease (LRD)

<sup>3</sup> Phylogenetic groups were identified using contigs generated by Meta-HTS and phylogroups of each sample was identified based on the phylogroup of each GVA contig obtained from Meta-HTS (Tables S6 and S7). <sup>3a</sup> Phylogenetic group of GVA was identified using near complete sequences.

<sup>3b</sup> Phylogroup by partial sequences.

<sup>4</sup> GRSPaV = grapevine rupestris stem pitting-associated virus, GRVFFV = grapevine rupestris vein feathering virus, GLRaV-1, -3 = grapevine leafroll-associated virus 1, and 3, GLRaV-4/5, -4/6, -4/9 = grapevine leafroll-associated virus 4 strains 5, 6 and 9, GVA = grapevine virus A, GVF = grapevine virus F, GRGV= grapevine red globe virus

\*GVA positives by the generic assays using both primer pairs Ah587/Ac995 and H7038/C7273.

# GVA positives by the group III specific assay using primer pairs GVAgroupIIIF/R.

**Table S6.** Basic statistics and list of contigs of the 50 grapevine samples sequenced by the NovaSeq (Illumina) instrument.

| Sample ID <sup>1</sup> | Raw reads | Trimmed reads | Avg length after trim (bp) | Total no. contigs | Viroid contigs* | Viruses contigs | Virus detected in this sample <sup>4</sup> | Exemplar isolate   | Genus              | Contig ID   | Contig length (nts) | Average coverage (x) | Percent age of genome covered | Similarity to exemplar isolate |
|------------------------|-----------|---------------|----------------------------|-------------------|-----------------|-----------------|--------------------------------------------|--------------------|--------------------|-------------|---------------------|----------------------|-------------------------------|--------------------------------|
| WIL1                   | 8,844,230 | 8,819,752     | 130.4                      | 87202             | 4               | 7               | GVA <sup>II</sup>                          | Is151 (X75433)     | <i>Vitivirus</i>   | WIL1_N53_SD | 7398                | 714.76               | 93.91%                        | 5478/6903 (79.36%)             |
|                        |           |               |                            |                   |                 |                 | GVA <sup>III</sup>                         | Is151 (X75433)     | <i>Vitivirus</i>   | WIL1_N54_SD | 7348                | 460.279              | 23.11%                        | 1366/1699 (80.4%)              |
|                        |           |               |                            |                   |                 |                 | GLRaV-4/9                                  | LR106 (FJ467503)   | <i>Ampelovirus</i> | WIL1_N15    | 13954               | 1657.313             | 53.79%                        | 5692/7439 (78.29%)             |
|                        |           |               |                            |                   |                 |                 | GRSPaV                                     | 3138-07 (JX559646) | <i>Foveavirus</i>  | WIL1_N23    | 8723                | 111.188              | 99.84%                        | 8141/8712 (93.45%)             |

|                    |                       |                                   |             |       |          |         |                       |                    |                       |                                   |             |         |          |                       |                       |
|--------------------|-----------------------|-----------------------------------|-------------|-------|----------|---------|-----------------------|--------------------|-----------------------|-----------------------------------|-------------|---------|----------|-----------------------|-----------------------|
|                    |                       |                                   |             |       |          |         |                       | GRSPaV             | 3138-07<br>(JX559646) | <i>Foveavirus</i>                 | WIL1_N35    | 8706    | 322.036  | 95.50%                | 6643/8333<br>(79.72%) |
|                    |                       |                                   |             |       |          |         |                       | GRVfV              | Mauzac<br>(KY513701)  | <i>Marafivirus</i><br>(tentative) | WIL1_N74    | 6738    | 74.103   | 100.00%               | 5835/6744<br>(86.52%) |
| WIL2               |                       |                                   |             |       |          |         |                       | GVA <sup>II</sup>  | Is151<br>(X75433)     | <i>Vitivirus</i>                  | WIL2_N36_SD | 7335    | 329.159  | 93.84%                | 5475/6898<br>(79.37%) |
|                    |                       |                                   |             |       |          |         |                       | GVA <sup>III</sup> | Is151<br>(X75433)     | <i>Vitivirus</i>                  | WIL2_N40_SD | 7183    | 545.375  | 20.91%                | 1207/1537<br>(78.53%) |
|                    |                       |                                   |             |       |          |         |                       | GLRaV-4/9          | LR106<br>(FJ467503)   | <i>Ampelovirus</i>                | WIL2_N7     | 13837   | 1083.389 | 55.12%                | 5966/7623<br>(78.26%) |
|                    |                       |                                   |             |       |          |         |                       | GRSPaV             | 3138-07<br>(JX559646) | <i>Foveavirus</i>                 | WIL2_N21    | 8728    | 98.879   | 99.97%                | 8168/8723<br>(93.64%) |
|                    |                       |                                   |             |       |          |         |                       | GRSPaV             | 3138-07<br>(JX559646) | <i>Foveavirus</i>                 | WIL2_N22    | 8707    | 211.968  | 95.50%                | 6646/8333<br>(79.76%) |
|                    |                       |                                   |             |       |          |         |                       | GRVfV              | Mauzac<br>(KY513701)  | <i>Marafivirus</i><br>(tentative) | WIL2_N88    | 5940    | 49.075   | 88.40%                | 5158/5949<br>(86.7%)  |
|                    |                       |                                   |             |       |          |         |                       | WIL3               |                       |                                   |             |         |          |                       |                       |
| GVA <sup>III</sup> | Is151<br>(X75433)     | <i>Vitivirus</i>                  | WIL3_N27_SD | 7366  | 1010.957 | 68.22%  | 3839/5015<br>(76.55%) |                    |                       |                                   |             |         |          |                       |                       |
| GLRaV-4/9          | LR106<br>(FJ467503)   | <i>Ampelovirus</i>                | WIL3_N6     | 13987 | 1825.827 | 55.14%  | 5973/7626<br>(78.32%) |                    |                       |                                   |             |         |          |                       |                       |
| GRSPaV             | 3138-07<br>(JX559646) | <i>Foveavirus</i>                 | WIL3_N17    | 8712  | 125.018  | 99.85%  | 8142/8713<br>(93.45%) |                    |                       |                                   |             |         |          |                       |                       |
| GRSPaV             | 3138-07<br>(JX559646) | <i>Foveavirus</i>                 | WIL3_N20    | 8286  | 168.353  | 90.60%  | 6263/7906<br>(79.22%) |                    |                       |                                   |             |         |          |                       |                       |
| GRVfV              | Mauzac<br>(KY513701)  | <i>Marafivirus</i><br>(tentative) | WIL3_N49    | 6718  | 86.218   | 100.00% | 5745/6731<br>(85.35%) |                    |                       |                                   |             |         |          |                       |                       |
| GRVfV              | Mauzac<br>(KY513701)  | <i>Marafivirus</i><br>(tentative) | WIL3_N57    | 6383  | 87.836   | 95.02%  | 5559/6395<br>(86.93%) |                    |                       |                                   |             |         |          |                       |                       |
| WIL4               | 6,510,068             | 6,491,857                         | 128.5       | 60366 | 2        | 18      | GVA <sup>II</sup>     | Is151<br>(X75433)  | <i>Vitivirus</i>      | WIL4_N28_SD                       | 7322        | 513.125 | 93.95%   | 5481/6906<br>(79.37%) |                       |

|      |           |           |       |       |   |    |  |                   |                    |                                |             |       |          |         |                      |
|------|-----------|-----------|-------|-------|---|----|--|-------------------|--------------------|--------------------------------|-------------|-------|----------|---------|----------------------|
|      |           |           |       |       |   |    |  | GLRaV-3           | NY1 (AF037268)     | <i>Ampelovirus</i>             | WIL4_N4     | 18785 | 2069.145 | 100.00% | 17548/17919 (97.93%) |
|      |           |           |       |       |   |    |  | GLRaV-4/9         | LR106 (FJ467503)   | <i>Ampelovirus</i>             | WIL4_N6     | 13984 | 1046.354 | 53.88%  | 5837/7451 (78.34%)   |
|      |           |           |       |       |   |    |  | GRSPaV            | 3138-07 (JX559646) | <i>Foveavirus</i>              | WIL4_N17    | 8807  | 72.847   | 99.95%  | 8161/8722 (93.57%)   |
|      |           |           |       |       |   |    |  | GRSPaV            | 3138-07 (JX559646) | <i>Foveavirus</i>              | WIL4_N18    | 8710  | 52.755   | 95.98%  | 6676/8375 (79.71%)   |
|      |           |           |       |       |   |    |  | GRVfV             | Mauzac (KY513701)  | <i>Marafivirus</i> (tentative) | WIL4_N417   | 3466  | 18.067   | 51.50%  | 2919/3466 (84.22%)   |
| WIL5 | 5,471,483 | 5,450,378 | 124.9 | 59171 | 6 | 14 |  | GVA <sup>II</sup> | Is151 (X75433)     | <i>Vitivirus</i>               | WIL5_N25_SD | 7330  | 214.968  | 93.46%  | 5451/6870 (79.34%)   |
|      |           |           |       |       |   |    |  | GLRaV-3           | NY1 (AF037268)     | <i>Ampelovirus</i>             | WIL5_N4     | 18634 | 647.413  | 100.00% | 17549/17919 (97.94%) |
|      |           |           |       |       |   |    |  | GLRaV-4/9         | LR106 (FJ467503)   | <i>Ampelovirus</i>             | WIL5_N7     | 13900 | 471.646  | 53.88%  | 5838/7452 (78.34%)   |
|      |           |           |       |       |   |    |  | GRSPaV            | 3138-07 (JX559646) | <i>Foveavirus</i>              | WIL5_N15    | 8753  | 138.559  | 95.98%  | 6678/8375 (79.74%)   |
|      |           |           |       |       |   |    |  | GRSPaV            | 3138-07 (JX559646) | <i>Foveavirus</i>              | WIL5_N16    | 8710  | 102.693  | 99.77%  | 8149/8706 (93.6%)    |
|      |           |           |       |       |   |    |  | GRVfV             | Mauzac (KY513701)  | <i>Marafivirus</i> (tentative) | WIL5_N148   | 3874  | 24.803   | 57.64%  | 3316/3879 (85.49%)   |
| WIL6 | 6,061,385 | 6,028,858 | 129   | 66387 | 2 | 11 |  | GVA <sup>II</sup> | Is151 (X75433)     | <i>Vitivirus</i>               | WIL6_N29_SD | 7356  | 428.922  | 93.61%  | 5464/6881 (79.41%)   |
|      |           |           |       |       |   |    |  | GLRaV-3           | NY1 (AF037268)     | <i>Ampelovirus</i>             | WIL6_N4     | 18681 | 935.641  | 100.00% | 17550/17919 (97.94%) |
|      |           |           |       |       |   |    |  | GLRaV-4/9         | LR106 (FJ467503)   | <i>Ampelovirus</i>             | WIL6_N6     | 13827 | 617.582  | 53.80%  | 5827/7440 (78.32%)   |
|      |           |           |       |       |   |    |  | GRSPaV            | 3138-07 (JX559646) | <i>Foveavirus</i>              | WIL6_N14    | 8701  | 28.127   | 74.41%  | 5203/6493 (80.13%)   |
|      |           |           |       |       |   |    |  | GRSPaV            | 3138-07 (JX559646) | <i>Foveavirus</i>              | WIL6_N21    | 8713  | 67.368   | 99.85%  | 8152/8713 (93.56%)   |

|      |           |           |       |       |   |    |                    |                       |                                   |                  |       |          |         |                         |
|------|-----------|-----------|-------|-------|---|----|--------------------|-----------------------|-----------------------------------|------------------|-------|----------|---------|-------------------------|
| WIL7 | 6,307,477 | 6,275,973 | 129.2 | 63855 | 4 | 14 | GRVFFV             | Mauzac<br>(KY513701)  | <i>Marafivirus</i><br>(tentative) | WIL6_N5518       | 1262  | 9.194    | 18.72%  | 1054/1260<br>(83.65%)   |
|      |           |           |       |       |   |    | GVA <sup>II</sup>  | Is151<br>(X75433)     | <i>Vitivirus</i>                  | WIL7_N29_SD      | 7336  | 148.576  | 93.97%  | 5505/6908<br>(79.69%)   |
|      |           |           |       |       |   |    | GLRaV-3            | NY1<br>(AF037268)     | <i>Ampelovirus</i>                | WIL7_N5          | 18485 | 1159.452 | 99.92%  | 17531/17905<br>(97.91%) |
|      |           |           |       |       |   |    | GLRaV-4/9          | LR106<br>(FJ467503)   | <i>Ampelovirus</i>                | WIL7_N6          | 13857 | 780.61   | 53.80%  | 5823/7440<br>(78.27%)   |
|      |           |           |       |       |   |    | GRSPaV             | 3138-07<br>(JX559646) | <i>Foveavirus</i>                 | WIL7_N16         | 8761  | 104.034  | 92.36%  | 6463/8059<br>(80.2%)    |
|      |           |           |       |       |   |    | GRVFFV             | Mauzac<br>(KY513701)  | <i>Marafivirus</i><br>(tentative) | WIL7_N640        | 3082  | 22.426   | 45.66%  | 2625/3073<br>(85.42%)   |
| WIL8 | 8,229,748 | 8,198,038 | 132.4 | 64064 | 2 | 17 | GVA <sup>II</sup>  | Is151<br>(X75433)     | <i>Vitivirus</i>                  | WIL8_N27_SD      | 7361  | 302.566  | 92.57%  | 5395/6805<br>(79.28%)   |
|      |           |           |       |       |   |    | GVA <sup>III</sup> | Is151<br>(X75433)     | <i>Vitivirus</i>                  | WIL8_N28_SD      | 7346  | 427.954  | 46.17%  | 2714/3394<br>(79.96%)   |
|      |           |           |       |       |   |    | GLRaV-3            | NY1<br>(AF037268)     | <i>Ampelovirus</i>                | WIL8_N4          | 18569 | 1646.454 | 100.00% | 17547/17919<br>(97.92%) |
|      |           |           |       |       |   |    | GLRaV-4/9          | LR106<br>(FJ467503)   | <i>Ampelovirus</i>                | WIL8_N7          | 13838 | 673.864  | 66.99%  | 7175/9265<br>(77.44%)   |
|      |           |           |       |       |   |    | GRSPaV             | 3138-07<br>(JX559646) | <i>Foveavirus</i>                 | WIL8_N16         | 8718  | 102.419  | 99.86%  | 8153/8714<br>(93.56%)   |
|      |           |           |       |       |   |    | GRSPaV             | 3138-07<br>(JX559646) | <i>Foveavirus</i>                 | WIL8_N17         | 8712  | 85.609   | 95.98%  | 6677/8375<br>(79.73%)   |
| WIL9 | 7,436,140 | 7,409,318 | 131.8 | 75379 | 3 | 18 | GRVFFV             | Mauzac<br>(KY513701)  | <i>Marafivirus</i><br>(tentative) | WIL8_N376        | 3334  | 23.328   | 49.58%  | 2888/3337<br>(86.54%)   |
|      |           |           |       |       |   |    | GVA <sup>III</sup> | Is151<br>(X75433)     | <i>Vitivirus</i>                  | WIL9_N31_LR<br>D | 7364  | 386.726  | 23.10%  | 1357/1698<br>(79.92%)   |
|      |           |           |       |       |   |    | GLRaV-3            | NY1<br>(AF037268)     | <i>Ampelovirus</i>                | WIL9_N3          | 18523 | 830.866  | 100.00% | 17548/17919<br>(97.93%) |
|      |           |           |       |       |   |    | GLRaV-4/6          | LR106<br>(FJ467503)   | <i>Ampelovirus</i>                | WIL9_N25253      | 558   | 181.254  | 4.03%   | 431/558<br>(77.24%)     |

|       |           |           |       |       |   |    |                    |                       |                                   |                   |       |         |         |                         |
|-------|-----------|-----------|-------|-------|---|----|--------------------|-----------------------|-----------------------------------|-------------------|-------|---------|---------|-------------------------|
|       |           |           |       |       |   |    | GLRaV-4/9          | LR106<br>(FJ467503)   | <i>Ampelovirus</i>                | WIL9_N5           | 13850 | 956.128 | 66.99%  | 7176/9265<br>(77.45%)   |
|       |           |           |       |       |   |    | GRSPaV             | 3138-07<br>(JX559646) | <i>Foveavirus</i>                 | WIL9_N19          | 8788  | 263.662 | 95.52%  | 6639/8335<br>(79.65%)   |
|       |           |           |       |       |   |    | GRSPaV             | 3138-07<br>(JX559646) | <i>Foveavirus</i>                 | WIL9_N21          | 8724  | 293.566 | 92.20%  | 6430/8045<br>(79.93%)   |
|       |           |           |       |       |   |    | GRSPaV             | 3138-07<br>(JX559646) | <i>Foveavirus</i>                 | WIL9_N22          | 8705  | 131.032 | 99.76%  | 8132/8705<br>(93.42%)   |
|       |           |           |       |       |   |    | GRVfV              | Mauzac<br>(KY513701)  | <i>Marafivirus</i><br>(tentative) | WIL9_N4759        | 1464  | 33.023  | 21.72%  | 1257/1462<br>(85.98%)   |
|       |           |           |       |       |   |    | GVA <sup>III</sup> | Is151<br>(X75433)     | <i>Vitivirus</i>                  | WIL10_N41_L<br>RD | 7384  | 493.56  | 23.09%  | 1357/1697<br>(79.96%)   |
|       |           |           |       |       |   |    | GLRaV-3            | NY1<br>(AF037268)     | <i>Ampelovirus</i>                | WIL10_N4          | 18319 | 830.274 | 99.91%  | 17531/17902<br>(97.93%) |
|       |           |           |       |       |   |    | GLRaV-4/6          | LR106<br>(FJ467503)   | <i>Ampelovirus</i>                | WIL10_N6          | 13957 | 803.428 | 55.67%  | 5938/7699<br>(77.13%)   |
| WIL10 | 8,132,470 | 8,107,226 | 130.8 | 74459 | 3 | 11 | GLRaV-4/9          | LR106<br>(FJ467503)   | <i>Ampelovirus</i>                | WIL10_N7          | 13854 | 577.642 | 66.99%  | 7177/9265<br>(77.46%)   |
|       |           |           |       |       |   |    | GRSPaV             | 3138-07<br>(JX559646) | <i>Foveavirus</i>                 | WIL10_N19         | 8788  | 186.984 | 99.97%  | 8169/8723<br>(93.65%)   |
|       |           |           |       |       |   |    | GRSPaV             | 3138-07<br>(JX559646) | <i>Foveavirus</i>                 | WIL10_N21         | 8706  | 162.929 | 95.91%  | 6668/8369<br>(79.67%)   |
|       |           |           |       |       |   |    | GRVfV              | Mauzac<br>(KY513701)  | <i>Marafivirus</i><br>(tentative) | WIL10_N82         | 6175  | 43.267  | 90.85%  | 5119/6114<br>(83.73%)   |
|       |           |           |       |       |   |    | GVA <sup>III</sup> | Is151<br>(X75433)     | <i>Vitivirus</i>                  | WIL11_N43_L<br>RD | 7365  | 550.786 | 23.11%  | 1361/1699<br>(80.11%)   |
|       |           |           |       |       |   |    | GLRaV-3            | NY1<br>(AF037268)     | <i>Ampelovirus</i>                | WIL11_N3          | 18692 | 843.165 | 100.00% | 17546/17919<br>(97.92%) |
| WIL11 | 7,348,392 | 7,327,397 | 131.3 | 70213 | 3 | 18 | GLRaV-4/6          | LR106<br>(FJ467503)   | <i>Ampelovirus</i>                | WIL11_N6          | 13925 | 898.052 | 55.65%  | 5934/7696<br>(77.1%)    |
|       |           |           |       |       |   |    | GLRaV-4/9          | LR106<br>(FJ467503)   | <i>Ampelovirus</i>                | WIL11_N7          | 13815 | 521.005 | 53.65%  | 5804/7420<br>(78.22%)   |

|       |           |           |       |       |   |    |  |                    |                       |                                   |                   |       |         |         |                         |
|-------|-----------|-----------|-------|-------|---|----|--|--------------------|-----------------------|-----------------------------------|-------------------|-------|---------|---------|-------------------------|
|       |           |           |       |       |   |    |  | GRSPaV             | 3138-07<br>(JX559646) | <i>Foveavirus</i>                 | WIL11_N24         | 8710  | 154.401 | 95.48%  | 6640/8332<br>(79.69%)   |
|       |           |           |       |       |   |    |  | GRSPaV             | 3138-07<br>(JX559646) | <i>Foveavirus</i>                 | WIL11_N26         | 8459  | 208.263 | 89.26%  | 6209/7789<br>(79.71%)   |
|       |           |           |       |       |   |    |  | GRVfV              | Mauzac<br>(KY513701)  | <i>Marafivirus</i><br>(tentative) | WIL11_N2122       | 2324  | 43.434  | 34.59%  | 2017/2328<br>(86.64%)   |
| WIL12 | 7,188,416 | 7,170,862 | 130.9 | 70252 | 4 | 14 |  | GVA <sup>III</sup> | Is151<br>(X75433)     | <i>Vitivirus</i>                  | WIL12_N33_L<br>RD | 7343  | 302.104 | 23.29%  | 1363/1712<br>(79.61%)   |
|       |           |           |       |       |   |    |  | GLRaV-3            | NY1<br>(AF037268)     | <i>Ampelovirus</i>                | WIL12_N3          | 18552 | 778.591 | 100.00% | 17548/17919<br>(97.93%) |
|       |           |           |       |       |   |    |  | GLRaV-4/6          | LR106<br>(FJ467503)   | <i>Ampelovirus</i>                | WIL12_N5          | 13846 | 662.026 | 55.68%  | 5940/7700<br>(77.14%)   |
|       |           |           |       |       |   |    |  | GLRaV-4/9          | LR106<br>(FJ467503)   | <i>Ampelovirus</i>                | WIL12_N6          | 13827 | 197.208 | 53.86%  | 5831/7449<br>(78.28%)   |
|       |           |           |       |       |   |    |  | GRSPaV             | 3138-07<br>(JX559646) | <i>Foveavirus</i>                 | WIL12_N21         | 8741  | 97.715  | 99.84%  | 8161/8712<br>(93.68%)   |
|       |           |           |       |       |   |    |  | GRSPaV             | 3138-07<br>(JX559646) | <i>Foveavirus</i>                 | WIL12_N22         | 8713  | 123.795 | 95.55%  | 6635/8338<br>(79.58%)   |
|       |           |           |       |       |   |    |  | GRVfV              | Mauzac<br>(KY513701)  | <i>Marafivirus</i><br>(tentative) | WIL12_N352        | 3874  | 42.252  | 57.62%  | 3313/3878<br>(85.43%)   |
| WIL13 | 6,529,218 | 6,499,025 | 114.9 | 50341 | 4 | 14 |  | GVA <sup>III</sup> | Is151<br>(X75433)     | <i>Vitivirus</i>                  | WIL13_N17_L<br>RD | 7380  | 386.722 | 23.11%  | 1365/1699<br>(80.34%)   |
|       |           |           |       |       |   |    |  | GLRaV-3            | NY1<br>(AF037268)     | <i>Ampelovirus</i>                | WIL13_N3          | 18496 | 960.277 | 99.98%  | 17544/17916<br>(97.92%) |
|       |           |           |       |       |   |    |  | GLRaV-4/5          | LR106<br>(FJ467503)   | <i>Ampelovirus</i>                | WIL13_N7          | 13817 | 675.435 | 67.76%  | 7435/9371<br>(79.34%)   |
|       |           |           |       |       |   |    |  | GLRaV-4/9          | LR106<br>(FJ467503)   | <i>Ampelovirus</i>                | WIL13_N6          | 13835 | 469.602 | 53.88%  | 5831/7451<br>(78.26%)   |
|       |           |           |       |       |   |    |  | GRSPaV             | 3138-07<br>(JX559646) | <i>Foveavirus</i>                 | WIL13_N13         | 8708  | 86.657  | 95.91%  | 6676/8369<br>(79.77%)   |
|       |           |           |       |       |   |    |  | GRSPaV             | 3138-07<br>(JX559646) | <i>Foveavirus</i>                 | WIL13_N14         | 8531  | 108.4   | 96.53%  | 7877/8423<br>(93.52%)   |

|       |           |           |       |       |   |    |           |                       |                                   |             |       |          |         |                         |
|-------|-----------|-----------|-------|-------|---|----|-----------|-----------------------|-----------------------------------|-------------|-------|----------|---------|-------------------------|
| WIL14 | 7,491,817 | 7,475,282 | 131.3 | 74114 | 3 | 19 | GRVFFV    | Mauzac<br>(KY513701)  | <i>Marafivirus</i><br>(tentative) | WIL13_N74   | 4675  | 29.422   | 69.58%  | 3960/4683<br>(84.56%)   |
|       |           |           |       |       |   |    | GLRaV-3   | NY1<br>(AF037268)     | <i>Ampelovirus</i>                | WIL14_N4    | 18628 | 1148.426 | 100.00% | 17551/17919<br>(97.95%) |
|       |           |           |       |       |   |    | GLRaV-4/5 | LR106<br>(FJ467503)   | <i>Ampelovirus</i>                | WIL14_N48   | 7283  | 172.25   | 16.98%  | 1994/2349<br>(84.89%)   |
|       |           |           |       |       |   |    | GLRaV-4/6 | LR106<br>(FJ467503)   | <i>Ampelovirus</i>                | WIL14_N5    | 13892 | 599.815  | 57.92%  | 6166/8010<br>(76.98%)   |
|       |           |           |       |       |   |    | GLRaV-4/9 | LR106<br>(FJ467503)   | <i>Ampelovirus</i>                | WIL14_N1317 | 2729  | 90.403   | 18.16%  | 1983/2512<br>(78.94%)   |
|       |           |           |       |       |   |    | GRSPaV    | 3138-07<br>(JX559646) | <i>Foveavirus</i>                 | WIL14_N19   | 8709  | 104.825  | 95.51%  | 6632/8334<br>(79.58%)   |
|       |           |           |       |       |   |    | GRSPaV    | 3138-07<br>(JX559646) | <i>Foveavirus</i>                 | WIL14_N20   | 8709  | 82.695   | 99.81%  | 8155/8709<br>(93.64%)   |
|       |           |           |       |       |   |    | GRSPaV    | 3138-07<br>(JX559646) | <i>Foveavirus</i>                 | WIL14_N21   | 8701  | 113.332  | 92.05%  | 6414/8032<br>(79.86%)   |
|       |           |           |       |       |   |    | GRVFFV    | Mauzac<br>(KY513701)  | <i>Marafivirus</i><br>(tentative) | WIL14_N338  | 4155  | 28.068   | 61.58%  | 3429/4144<br>(82.75%)   |
| WIL15 | 7,789,197 | 7,711,086 | 126.7 | 63971 | 3 | 15 | GLRaV-3   | NY1<br>(AF037268)     | <i>Ampelovirus</i>                | WIL15_N4    | 18563 | 1298.621 | 100.00% | 17549/17919<br>(97.94%) |
|       |           |           |       |       |   |    | GLRaV-4/5 | LR106<br>(FJ467503)   | <i>Ampelovirus</i>                | WIL15_N8    | 13095 | 179.913  | 67.61%  | 7415/9351<br>(79.3%)    |
|       |           |           |       |       |   |    | GLRaV-4/6 | LR106<br>(FJ467503)   | <i>Ampelovirus</i>                | WIL15_N6    | 14017 | 678.683  | 57.92%  | 6166/8010<br>(76.98%)   |
|       |           |           |       |       |   |    | GRSPaV    | 3138-07<br>(JX559646) | <i>Foveavirus</i>                 | WIL15_N15   | 8740  | 102.612  | 99.84%  | 8158/8712<br>(93.64%)   |
|       |           |           |       |       |   |    | GRSPaV    | 3138-07<br>(JX559646) | <i>Foveavirus</i>                 | WIL15_N16   | 8796  | 249.931  | 93.15%  | 6508/8128<br>(80.07%)   |
|       |           |           |       |       |   |    | GRVFFV    | Mauzac<br>(KY513701)  | <i>Marafivirus</i><br>(tentative) | WIL15_N478  | 3358  | 41.478   | 49.91%  | 2853/3359<br>(84.94%)   |
| WIL17 | 6,146,002 | 6,124,074 | 128.5 | 57552 | 3 | 13 | GRSPaV    | 3138-07<br>(JX559646) | <i>Foveavirus</i>                 | WIL17_N13   | 8709  | 144.958  | 95.54%  | 6646/8337<br>(79.72%)   |

|       |           |           |       |       |   |    |                   |                       |                                   |            |       |         |        |                       |
|-------|-----------|-----------|-------|-------|---|----|-------------------|-----------------------|-----------------------------------|------------|-------|---------|--------|-----------------------|
| WIL19 | 7,469,836 | 7,439,964 | 129.8 | 60025 | 4 | 10 | GRSPaV            | 3138-07<br>(JX559646) | <i>Foveavirus</i>                 | WIL17_N14  | 8705  | 138.686 | 99.76% | 8130/8705<br>(93.39%) |
|       |           |           |       |       |   |    | GRVfV             | Mauzac<br>(KY513701)  | <i>Marafivirus</i><br>(tentative) | WIL17_N147 | 4331  | 25.129  | 64.44% | 3677/4337<br>(84.78%) |
|       |           |           |       |       |   |    | GLRaV-4/6         | LR106<br>(FJ467503)   | <i>Ampelovirus</i>                | WIL19_N6   | 13930 | 546.193 | 56.25% | 6011/7780<br>(77.26%) |
|       |           |           |       |       |   |    | GRSPaV            | 3138-07<br>(JX559646) | <i>Foveavirus</i>                 | WIL19_N13  | 8763  | 92.843  | 99.84% | 8163/8712<br>(93.7%)  |
|       |           |           |       |       |   |    | GRSPaV            | 3138-07<br>(JX559646) | <i>Foveavirus</i>                 | WIL19_N14  | 8709  | 163.499 | 95.54% | 6645/8337<br>(79.7%)  |
| WIL22 | 6,389,640 | 6,375,696 | 130.9 | 58491 | 4 | 15 | GRVfV             | Mauzac<br>(KY513701)  | <i>Marafivirus</i><br>(tentative) | WIL19_N522 | 2942  | 23.692  | 43.76% | 2505/2945<br>(85.06%) |
|       |           |           |       |       |   |    | GLRaV-4/6         | LR106<br>(FJ467503)   | <i>Ampelovirus</i>                | WIL22_N5   | 13805 | 454.366 | 55.65% | 5935/7696<br>(77.12%) |
|       |           |           |       |       |   |    | GRSPaV            | 3138-07<br>(JX559646) | <i>Foveavirus</i>                 | WIL22_N12  | 8712  | 107.732 | 95.56% | 6645/8339<br>(79.69%) |
|       |           |           |       |       |   |    | GRSPaV            | 3138-07<br>(JX559646) | <i>Foveavirus</i>                 | WIL22_N13  | 8711  | 81.514  | 99.83% | 8136/8711<br>(93.4%)  |
|       |           |           |       |       |   |    | GRVfV             | Mauzac<br>(KY513701)  | <i>Marafivirus</i><br>(tentative) | WIL22_N148 | 4498  | 32.339  | 66.92% | 3845/4504<br>(85.37%) |
| WIL24 | 7,389,330 | 7,361,985 | 133.5 | 68055 | 2 | 13 | GLRaV-4/6         | LR106<br>(FJ467503)   | <i>Ampelovirus</i>                | WIL24_N5   | 13867 | 642.107 | 55.68% | 5939/7700<br>(77.13%) |
|       |           |           |       |       |   |    | GRSPaV            | 3138-07<br>(JX559646) | <i>Foveavirus</i>                 | WIL24_N17  | 8740  | 78.037  | 95.56% | 6664/8339<br>(79.91%) |
|       |           |           |       |       |   |    | GRSPaV            | 3138-07<br>(JX559646) | <i>Foveavirus</i>                 | WIL24_N18  | 8702  | 51.304  | 99.74% | 8122/8703<br>(93.32%) |
|       |           |           |       |       |   |    | GRVfV             | Mauzac<br>(KY513701)  | <i>Marafivirus</i><br>(tentative) | WIL24_N775 | 3070  | 17.366  | 45.29% | 2585/3048<br>(84.81%) |
| LC5   | 3,641,648 | 3,577,621 | 125.2 | 39666 | 5 | 7  | GVA <sup>II</sup> | Is151<br>(X75433)     | <i>Vitivirus</i>                  | LC5_N12_SD | 7339  | 136.552 | 92.49% | 5401/6799<br>(79.44%) |
|       |           |           |       |       |   |    | GLRaV-4/9         | LR106<br>(FJ467503)   | <i>Ampelovirus</i>                | LC5_N5     | 13847 | 269.42  | 53.88% | 5828/7452<br>(78.21%) |

|      |           |           |       |       |   |   |                   |                       |                    |             |       |         |        |                       |
|------|-----------|-----------|-------|-------|---|---|-------------------|-----------------------|--------------------|-------------|-------|---------|--------|-----------------------|
| LC6  | 5,893,931 | 5,869,862 | 127.4 | 57289 | 5 | 7 | GRSPaV            | 3138-07<br>(JX559646) | <i>Foveavirus</i>  | LC5_N7      | 8704  | 70.512  | 99.75% | 8161/8704<br>(93.76%) |
|      |           |           |       |       |   |   | GVA <sup>II</sup> | Is151<br>(X75433)     | <i>Vitivirus</i>   | LC6_N19_SD  | 7348  | 137.147 | 93.61% | 5456/6881<br>(79.29%) |
|      |           |           |       |       |   |   | GLRaV-4/9         | LR106<br>(FJ467503)   | <i>Ampelovirus</i> | LC6_N6      | 13838 | 395.085 | 53.86% | 5824/7449<br>(78.18%) |
|      |           |           |       |       |   |   | GRSPaV            | 3138-07<br>(JX559646) | <i>Foveavirus</i>  | LC6_N11     | 8712  | 84.278  | 99.84% | 8167/8712<br>(93.74%) |
|      |           |           |       |       |   |   | GRSPaV            | 3138-07<br>(JX559646) | <i>Foveavirus</i>  | LC6_N12     | 8695  | 121.041 | 95.38% | 6641/8323<br>(79.79%) |
| LC7  | 6,496,609 | 6,479,256 | 132.5 | 74472 | 5 | 7 | GVA <sup>II</sup> | Is151<br>(X75433)     | <i>Vitivirus</i>   | LC7_N42_SD  | 7339  | 205.542 | 93.58% | 5454/6879<br>(79.28%) |
|      |           |           |       |       |   |   | GLRaV-4/9         | LR106<br>(FJ467503)   | <i>Ampelovirus</i> | LC7_N6      | 13886 | 429.195 | 53.85% | 5823/7448<br>(78.18%) |
|      |           |           |       |       |   |   | GRSPaV            | 3138-07<br>(JX559646) | <i>Foveavirus</i>  | LC7_N24     | 8707  | 154.287 | 95.46% | 6641/8330<br>(79.72%) |
|      |           |           |       |       |   |   | GRSPaV            | 3138-07<br>(JX559646) | <i>Foveavirus</i>  | LC7_N25     | 8700  | 79.634  | 92.05% | 6426/8032 (80%)       |
| LC9  | 7,067,771 | 7,040,778 | 116   | 54559 | 5 | 7 | GVA <sup>II</sup> | Is151<br>(X75433)     | <i>Vitivirus</i>   | LC9_N19_SD  | 7336  | 107.851 | 93.93% | 5464/6905<br>(79.13%) |
|      |           |           |       |       |   |   | GLRaV-4/9         | LR106<br>(FJ467503)   | <i>Ampelovirus</i> | LC9_N5      | 13886 | 460.939 | 53.79% | 5815/7439<br>(78.17%) |
|      |           |           |       |       |   |   | GRSPaV            | 3138-07<br>(JX559646) | <i>Foveavirus</i>  | LC9_N10     | 8746  | 49.552  | 99.85% | 8166/8713<br>(93.72%) |
|      |           |           |       |       |   |   | GRSPaV            | 3138-07<br>(JX559646) | <i>Foveavirus</i>  | LC9_N13     | 8347  | 137.518 | 91.27% | 6321/7964<br>(79.37%) |
| LC10 | 7,527,983 | 7,503,883 | 128.9 | 80310 | 4 | 6 | GVA <sup>II</sup> | Is151<br>(X75433)     | <i>Vitivirus</i>   | LC10_N33_SD | 7326  | 201.187 | 93.85% | 5486/6899<br>(79.52%) |
|      |           |           |       |       |   |   | GLRaV-4/9         | LR106<br>(FJ467503)   | <i>Ampelovirus</i> | LC10_N6     | 13855 | 721.857 | 53.88% | 5846/7452<br>(78.45%) |
|      |           |           |       |       |   |   | GRSPaV            | 3138-07<br>(JX559646) | <i>Foveavirus</i>  | LC10_N15    | 8778  | 97.815  | 99.87% | 8173/8715<br>(93.78%) |

|      |           |           |       |       |   |   |                   |                       |                                   |                  |       |          |        |                       |
|------|-----------|-----------|-------|-------|---|---|-------------------|-----------------------|-----------------------------------|------------------|-------|----------|--------|-----------------------|
| LC11 | 8,104,889 | 8,047,276 | 133.2 | 76962 | 3 | 8 | GRSPaV            | 3138-07<br>(JX559646) | <i>Foveavirus</i>                 | LC10_N16         | 8755  | 207.959  | 95.73% | 6673/8353<br>(79.89%) |
|      |           |           |       |       |   |   | GRSPaV            | 3138-07<br>(JX559646) | <i>Foveavirus</i>                 | LC10_N17         | 8708  | 210.924  | 92.87% | 6498/8104<br>(80.18%) |
|      |           |           |       |       |   |   | GVA <sup>II</sup> | Is151<br>(X75433)     | <i>Vitivirus</i>                  | LC11_N45_SD      | 7345  | 329.374  | 93.97% | 5470/6908<br>(79.18%) |
|      |           |           |       |       |   |   | GLRaV-4/9         | LR106<br>(FJ467503)   | <i>Ampelovirus</i>                | LC11_N6          | 13853 | 1504.603 | 53.88% | 5847/7451<br>(78.47%) |
|      |           |           |       |       |   |   | GRSPaV            | 3138-07<br>(JX559646) | <i>Foveavirus</i>                 | LC11_N23         | 8824  | 208.7    | 95.32% | 6643/8318<br>(79.86%) |
|      |           |           |       |       |   |   | GRSPaV            | 3138-07<br>(JX559646) | <i>Foveavirus</i>                 | LC11_N24         | 8708  | 204.944  | 95.73% | 6669/8353<br>(79.84%) |
|      |           |           |       |       |   |   | GRSPaV            | 3138-07<br>(JX559646) | <i>Foveavirus</i>                 | LC11_N25         | 8699  | 122.517  | 99.69% | 8144/8699<br>(93.62%) |
|      |           |           |       |       |   |   | GRVfV             | Mauzac<br>(KY513701)  | <i>Marafivirus</i><br>(tentative) | LC11_N65         | 6692  | 65.603   | 99.70% | 5708/6710<br>(85.07%) |
| LC12 | 5,786,465 | 5,765,655 | 130   | 60117 | 6 | 9 | GRVfV             | Mauzac<br>(KY513701)  | <i>Marafivirus</i><br>(tentative) | LC11_N98         | 6116  | 70.257   | 90.82% | 5118/6112<br>(83.74%) |
|      |           |           |       |       |   |   | GVA <sup>II</sup> | Is151<br>(X75433)     | <i>Vitivirus</i>                  | LC12_N124_S<br>D | 4608  | 128.498  | 62.78% | 3681/4615<br>(79.76%) |
|      |           |           |       |       |   |   | GLRaV-4/9         | LR106<br>(FJ467503)   | <i>Ampelovirus</i>                | LC12_N5          | 13847 | 706.131  | 53.88% | 5848/7452<br>(78.48%) |
|      |           |           |       |       |   |   | GRSPaV            | 3138-07<br>(JX559646) | <i>Foveavirus</i>                 | LC12_N11         | 8763  | 60.616   | 99.85% | 8172/8713<br>(93.79%) |
| LC13 | 6,381,939 | 6,366,843 | 128.4 | 69862 | 5 | 7 | GRSPaV            | 3138-07<br>(JX559646) | <i>Foveavirus</i>                 | LC12_N12         | 8710  | 115.289  | 95.55% | 6658/8338<br>(79.85%) |
|      |           |           |       |       |   |   | GVA <sup>II</sup> | Is151<br>(X75433)     | <i>Vitivirus</i>                  | LC13_N31_SD      | 7325  | 218.789  | 74.26% | 4324/5459<br>(79.21%) |
|      |           |           |       |       |   |   | GLRaV-4/9         | LR106<br>(FJ467503)   | <i>Ampelovirus</i>                | LC13_N3          | 13836 | 599.363  | 53.62% | 5792/7416<br>(78.1%)  |
|      |           |           |       |       |   |   | GRSPaV            | 3138-07<br>(JX559646) | <i>Foveavirus</i>                 | LC13_N16         | 8712  | 216.011  | 95.50% | 6649/8333<br>(79.79%) |

|      |           |           |       |       |    |   |                   |                       |                                   |             |       |          |        |                       |
|------|-----------|-----------|-------|-------|----|---|-------------------|-----------------------|-----------------------------------|-------------|-------|----------|--------|-----------------------|
| LC14 | 7,454,524 | 7,438,758 | 133.3 | 80194 | 5  | 7 | GRSPaV            | 3138-07<br>(JX559646) | <i>Foveavirus</i>                 | LC13_N21    | 8176  | 210.55   | 21.12% | 1443/1843<br>(78.3%)  |
|      |           |           |       |       |    |   | GVA <sup>II</sup> | Is151<br>(X75433)     | <i>Vitivirus</i>                  | LC14_N49_SD | 7361  | 461.658  | 94.08% | 5474/6916<br>(79.15%) |
|      |           |           |       |       |    |   | GVA <sup>II</sup> | Is151<br>(X75433)     | <i>Vitivirus</i>                  | LC14_N51_SD | 7305  | 465.173  | 93.55% | 5444/6877<br>(79.16%) |
|      |           |           |       |       |    |   | GLRaV-4/9         | LR106<br>(FJ467503)   | <i>Ampelovirus</i>                | LC14_N6     | 13842 | 1053.333 | 53.88% | 5826/7451<br>(78.19%) |
|      |           |           |       |       |    |   | GRSPaV            | 3138-07<br>(JX559646) | <i>Foveavirus</i>                 | LC14_N30    | 8702  | 192.266  | 91.76% | 6412/8007<br>(80.08%) |
|      |           |           |       |       |    |   | GRSPaV            | 3138-07<br>(JX559646) | <i>Foveavirus</i>                 | LC14_N31    | 8702  | 119.366  | 99.72% | 8154/8702<br>(93.7%)  |
|      |           |           |       |       |    |   | GRSPaV            | 3138-07<br>(JX559646) | <i>Foveavirus</i>                 | LC14_N33    | 8580  | 189.477  | 90.30% | 6311/7880<br>(80.09%) |
| LC16 | 6,465,268 | 6,434,000 | 131.9 | 64080 | 12 | 7 | GRSPaV            | 3138-07<br>(JX559646) | <i>Foveavirus</i>                 | LC16_N15    | 8739  | 195.301  | 99.97% | 8169/8723<br>(93.65%) |
|      |           |           |       |       |    |   | GRSPaV            | 3138-07<br>(JX559646) | <i>Foveavirus</i>                 | LC16_N16    | 8700  | 186.972  | 92.07% | 6443/8034<br>(80.2%)  |
|      |           |           |       |       |    |   | GRVfV             | Mauzac<br>(KY513701)  | <i>Marafivirus</i><br>(tentative) | LC16_N40    | 6476  | 79.407   | 96.51% | 5431/6495<br>(83.62%) |
| LC18 | 7,790,861 | 7,770,023 | 132.5 | 69922 | 5  | 8 | GRSPaV            | 3138-07<br>(JX559646) | <i>Foveavirus</i>                 | LC18_N16    | 8711  | 163.878  | 99.83% | 8163/8711<br>(93.71%) |
|      |           |           |       |       |    |   | GRSPaV            | 3138-07<br>(JX559646) | <i>Foveavirus</i>                 | LC18_N17    | 8709  | 330.907  | 95.48% | 6636/8332<br>(79.64%) |
|      |           |           |       |       |    |   | GRVfV             | Mauzac<br>(KY513701)  | <i>Marafivirus</i><br>(tentative) | LC18_N18191 | 686   | 5.516    | 10.21% | 571/687<br>(83.11%)   |
| LC20 | 8,309,672 | 8,290,763 | 135.1 | 69527 | 3  | 6 | GRSPaV            | 3138-07<br>(JX559646) | <i>Foveavirus</i>                 | LC20_N17    | 8779  | 252.426  | 99.97% | 8179/8723<br>(93.76%) |
|      |           |           |       |       |    |   | GRSPaV            | 3138-07<br>(JX559646) | <i>Foveavirus</i>                 | LC20_N22    | 8707  | 125.468  | 92.13% | 6430/8039<br>(79.99%) |
| LC24 | 8,548,571 | 8,527,508 | 131.2 | 65729 | 3  | 5 | GRSPaV            | 3138-07<br>(JX559646) | <i>Foveavirus</i>                 | LC24_N15    | 8727  | 244.805  | 99.84% | 8159/8712<br>(93.65%) |

|       |           |           |       |       |    |    |                    |                       |                                   |                       |       |         |        |                        |
|-------|-----------|-----------|-------|-------|----|----|--------------------|-----------------------|-----------------------------------|-----------------------|-------|---------|--------|------------------------|
| LC27  | 7,009,354 | 6,937,713 | 129.9 | 60293 | 3  | 8  | GRSPaV             | 3138-07<br>(JX559646) | <i>Foveavirus</i>                 | LC24_N19              | 8709  | 296.035 | 93.10% | 6500/8124<br>(80.01%)  |
|       |           |           |       |       |    |    | GRSPaV             | 3138-07<br>(JX559646) | <i>Foveavirus</i>                 | LC27_N15              | 8704  | 142.126 | 99.75% | 8163/8704<br>(93.78%)  |
|       |           |           |       |       |    |    | GRSPaV             | 3138-07<br>(JX559646) | <i>Foveavirus</i>                 | LC27_N16              | 8690  | 130.19  | 91.83% | 6425/8013<br>(80.18%)  |
|       |           |           |       |       |    |    | GRVfV              | Mauzac<br>(KY513701)  | <i>Marafivirus</i><br>(tentative) | LC27_N2994            | 1852  | 8.204   | 27.55% | 1583/1854<br>(85.38%)  |
| BV1   | 7,793,165 | 7,684,434 | 138.4 | 65632 | 5  | 14 | GVA <sup>I</sup>   | Is151<br>(X75433)     | <i>Vitivirus</i>                  | BV1_N31_mild<br>_LRD  | 7356  | 757.595 | 94.86% | 5628/6973<br>(80.71%)  |
|       |           |           |       |       |    |    | GLRaV-1            | 1050<br>(JQ023131)    | <i>Ampelovirus</i>                | BV1_N3                | 18326 | 606.399 | 60.16% | 9152/11226<br>(81.53%) |
|       |           |           |       |       |    |    | GRSPaV             | 3138-07<br>(JX559646) | <i>Foveavirus</i>                 | BV1_N20               | 8709  | 426.948 | 95.55% | 6663/8338<br>(79.91%)  |
|       |           |           |       |       |    |    | GRVfV              | Mauzac<br>(KY513701)  | <i>Marafivirus</i><br>(tentative) | BV1_N2869             | 2158  | 10.479  | 32.08% | 1850/2159<br>(85.69%)  |
| BV3   | 6,823,261 | 6,801,634 | 130.8 | 45040 | 10 | 8  | GVA <sup>I</sup>   | Is151<br>(X75433)     | <i>Vitivirus</i>                  | BV3_N260_mil<br>d_LRD | 3217  | 333.538 | 43.98% | 2678/3233<br>(82.83%)  |
|       |           |           |       |       |    |    | GLRaV-1            | 1050<br>(JQ023131)    | <i>Ampelovirus</i>                | BV3_N5                | 14324 | 181.667 | 49.67% | 7681/9267<br>(82.89%)  |
|       |           |           |       |       |    |    | GRSPaV             | 3138-07<br>(JX559646) | <i>Foveavirus</i>                 | BV3_N9                | 8710  | 273.563 | 99.82% | 8144/8710<br>(93.5%)   |
|       |           |           |       |       |    |    | GRSPaV             | 3138-07<br>(JX559646) | <i>Foveavirus</i>                 | BV3_N10               | 8657  | 450.294 | 94.90% | 6600/8281<br>(79.7%)   |
| BV6   | 6,021,139 | 5,998,506 | 131.4 | 47521 | 5  | 5  | GRSPaV             | 3138-07<br>(JX559646) | <i>Foveavirus</i>                 | BV6_N11               | 8772  | 445.154 | 95.58% | 6656/8340<br>(79.81%)  |
|       |           |           |       |       |    |    | GRVfV              | Mauzac<br>(KY513701)  | <i>Marafivirus</i><br>(tentative) | BV6_N15461            | 597   | 4.702   | 8.87%  | 521/597<br>(87.27%)    |
| Cabw1 | 7,450,095 | 7,434,263 | 129   | 74364 | 3  | 18 | GVA <sup>II</sup>  | Is151<br>(X75433)     | <i>Vitivirus</i>                  | Cabw1_N153_<br>LRD    | 5086  | 103.457 | 19.75% | 1159/1452<br>(79.82%)  |
|       |           |           |       |       |    |    | GVA <sup>III</sup> | Is151<br>(X75433)     | <i>Vitivirus</i>                  | Cabw1_N38_L<br>RD     | 7343  | 379.453 | 23.28% | 1374/1711<br>(80.3%)   |

|  |  |  |  |  |  |  |                    |                             |                                   |                     |       |          |         |                         |
|--|--|--|--|--|--|--|--------------------|-----------------------------|-----------------------------------|---------------------|-------|----------|---------|-------------------------|
|  |  |  |  |  |  |  | GVF                | AUD46129<br>(JX105428)      | <i>Vitivirus</i><br>(tentative)   | Cabw1_N36           | 7520  | 79.977   | 99.55%  | 6734/7517<br>(89.49%)   |
|  |  |  |  |  |  |  | GLRaV-3            | NY1<br>(AF037268)           | <i>Ampelovirus</i>                | Cabw1_N2            | 18502 | 1089.258 | 100.00% | 17548/17919<br>(97.93%) |
|  |  |  |  |  |  |  | GLRaV-4/9          | LR106<br>(FJ467503)         | <i>Ampelovirus</i>                | Cabw1_N57           | 6596  | 197.098  | 46.91%  | 5106/6488<br>(78.7%)    |
|  |  |  |  |  |  |  | GRSPaV             | 3138-07<br>(JX559646)       | <i>Foveavirus</i>                 | Cabw1_N45           | 6965  | 280.323  | 41.12%  | 2933/3588<br>(81.74%)   |
|  |  |  |  |  |  |  | GRGV               | Graciano-T101<br>(KX171166) | <i>Maculavirus</i><br>(tentative) | Cabw1_N1205<br>7    | 919   | 6.351    | 13.64%  | 817/936<br>(87.29%)     |
|  |  |  |  |  |  |  | GVA <sup>II</sup>  | Is151<br>(X75433)           | <i>Vitivirus</i>                  | Cabw2_N2273<br>_LRD | 1384  | 169.63   | 18.77%  | 1111/1380<br>(80.51%)   |
|  |  |  |  |  |  |  | GVA <sup>III</sup> | Is151<br>(X75433)           | <i>Vitivirus</i>                  | Cabw2_N6157<br>_LRD | 893   | 292.233  | 11.45%  | 716/842<br>(85.04%)     |
|  |  |  |  |  |  |  | GVF                | AUD46129<br>(JX105428)      | <i>Vitivirus</i><br>(tentative)   | Cabw2_N17           | 7522  | 24.739   | 99.62%  | 6739/7522<br>(89.49%)   |
|  |  |  |  |  |  |  | GLRaV-3            | NY1<br>(AF037268)           | <i>Ampelovirus</i>                | Cabw2_N1            | 18627 | 694.995  | 100.00% | 17548/17919<br>(97.93%) |
|  |  |  |  |  |  |  | GLRaV-4/9          | LR106<br>(FJ467503)         | <i>Ampelovirus</i>                | Cabw2_N6            | 13818 | 174.28   | 53.86%  | 5832/7449<br>(78.29%)   |
|  |  |  |  |  |  |  | GRSPaV             | 3138-07<br>(JX559646)       | <i>Foveavirus</i>                 | Cabw2_N11           | 8712  | 224.33   | 95.58%  | 6649/8340<br>(79.72%)   |
|  |  |  |  |  |  |  | GRSPaV             | 3138-07<br>(JX559646)       | <i>Foveavirus</i>                 | Cabw2_N12           | 8712  | 139.557  | 99.84%  | 8151/8712<br>(93.56%)   |
|  |  |  |  |  |  |  | GRGV               | Graciano-T101<br>(KX171166) | <i>Maculavirus</i><br>(tentative) | Cabw2_N1764<br>7    | 514   | 5.957    | 7.47%   | 439/513<br>(85.58%)     |
|  |  |  |  |  |  |  | GVA <sup>II</sup>  | Is151<br>(X75433)           | <i>Vitivirus</i>                  | Cabw11_N36_<br>LRD  | 7331  | 331.053  | 93.78%  | 5477/6894<br>(79.45%)   |
|  |  |  |  |  |  |  | GLRaV-3            | NY1<br>(AF037268)           | <i>Ampelovirus</i>                | Cabw11_N3           | 18623 | 1219.735 | 100.00% | 17543/17919<br>(97.9%)  |

|         |           |           |       |       |   |    |  |                    |                             |                                   |                      |       |          |         |                         |
|---------|-----------|-----------|-------|-------|---|----|--|--------------------|-----------------------------|-----------------------------------|----------------------|-------|----------|---------|-------------------------|
|         |           |           |       |       |   |    |  | GLRaV-4/9          | LR106<br>(FJ467503)         | <i>Ampelovirus</i>                | Cabw11_N31           | 13832 | 251.088  | 53.85%  | 5831/7448<br>(78.29%)   |
|         |           |           |       |       |   |    |  | GRSPaV             | 3138-07<br>(JX559646)       | <i>Foveavirus</i>                 | Cabw11_N22           | 8738  | 227.72   | 99.95%  | 8169/8722<br>(93.66%)   |
|         |           |           |       |       |   |    |  | GRVfV              | Mauzac<br>(KY513701)        | <i>Marafivirus</i><br>(tentative) | Cabw11_N111<br>7     | 2784  | 16.009   | 41.38%  | 2384/2785<br>(85.6%)    |
|         |           |           |       |       |   |    |  | GRGV               | Graciano-T101<br>(KX171166) | <i>Maculavirus</i><br>(tentative) | Cabw11_N403<br>26    | 365   | 4.148    | 4.76%   | 277/327<br>(84.71%)     |
| Cabw12  | 8,325,871 | 8,311,536 | 126.5 | 71483 | 3 | 16 |  | GVA <sup>II</sup>  | Is151<br>(X75433)           | <i>Vitivirus</i>                  | Cabw12_N47_<br>LRD   | 7359  | 300.854  | 94.08%  | 5518/6916<br>(79.79%)   |
|         |           |           |       |       |   |    |  | GVA <sup>II</sup>  | Is151<br>(X75433)           | <i>Vitivirus</i>                  | Cabw12_N52_<br>LRD   | 7056  | 297.598  | 90.55%  | 5266/6656<br>(79.12%)   |
|         |           |           |       |       |   |    |  | GVA <sup>III</sup> | Is151<br>(X75433)           | <i>Vitivirus</i>                  | Cabw12_N650<br>_LRD  | 3537  | 396.084  | 23.32%  | 1372/1714<br>(80.05%)   |
|         |           |           |       |       |   |    |  | GLRaV-3            | NY1<br>(AF037268)           | <i>Ampelovirus</i>                | Cabw12_N4            | 18563 | 1096.171 | 100.00% | 17548/17919<br>(97.93%) |
|         |           |           |       |       |   |    |  | GLRaV-4/9          | LR106<br>(FJ467503)         | <i>Ampelovirus</i>                | Cabw12_N7            | 13848 | 320.447  | 53.63%  | 5802/7417<br>(78.23%)   |
|         |           |           |       |       |   |    |  | GRSPaV             | 3138-07<br>(JX559646)       | <i>Foveavirus</i>                 | Cabw12_N27           | 8752  | 273.132  | 99.89%  | 8155/8716<br>(93.56%)   |
|         |           |           |       |       |   |    |  | GRVfV              | Mauzac<br>(KY513701)        | <i>Marafivirus</i><br>(tentative) | Cabw12_N135<br>0     | 2775  | 17.089   | 41.32%  | 2377/2781<br>(85.47%)   |
|         |           |           |       |       |   |    |  | GRGV               | Graciano-T101<br>(KX171166) | <i>Maculavirus</i><br>(tentative) | Cabw12_N108<br>96    | 981   | 0        | 14.28%  | 877/980<br>(89.49%)     |
| Merlot1 | 8,290,479 | 8,254,982 | 130.1 | 72852 | 2 | 15 |  | GVA <sup>II</sup>  | Is151<br>(X75433)           | <i>Vitivirus</i>                  | Merlot1_N121_<br>SD  | 7356  | 175.8    | 93.50%  | 5434/6873<br>(79.06%)   |
|         |           |           |       |       |   |    |  | GVA <sup>III</sup> | Is151<br>(X75433)           | <i>Vitivirus</i>                  | Melort1_N1053<br>_SD | 2937  | 175.8    | 23.26%  | 1372/1710<br>(80.23%)   |
|         |           |           |       |       |   |    |  | GLRaV-3            | NY1<br>(AF037268)           | <i>Ampelovirus</i>                | Merlot1_N5           | 18715 | 655.547  | 100.00% | 17550/17919<br>(97.94%) |

|       |           |           |       |       |   |   |  |                    |                    |                                |              |       |          |         |                      |
|-------|-----------|-----------|-------|-------|---|---|--|--------------------|--------------------|--------------------------------|--------------|-------|----------|---------|----------------------|
|       |           |           |       |       |   |   |  | GLRaV-4/9          | LR106 (FJ467503)   | <i>Ampelovirus</i>             | Merlot1_N18  | 9339  | 271.871  | 51.33%  | 5526/7099 (77.84%)   |
|       |           |           |       |       |   |   |  | GRSPaV             | 3138-07 (JX559646) | <i>Foveavirus</i>              | Merlot1_N23  | 8787  | 146.887  | 99.97%  | 8157/8723 (93.51%)   |
|       |           |           |       |       |   |   |  | GRSPaV             | 3138-07 (JX559646) | <i>Foveavirus</i>              | Merlot1_N25  | 8708  | 244.398  | 95.53%  | 6655/8336 (79.83%)   |
| WIL47 | 6,969,071 | 6,951,444 | 132.4 | 65411 | 4 | 7 |  | GVA <sup>III</sup> | Is151 (X75433)     | <i>Vitivirus</i>               | WIL47_N43_SD | 7352  | 138.221  | 23.29%  | 1371/1712 (80.08%)   |
|       |           |           |       |       |   |   |  | GLRaV-3            | NY1 (AF037268)     | <i>Ampelovirus</i>             | WIL47_N4     | 18722 | 1722.427 | 100.00% | 17548/17919 (97.93%) |
|       |           |           |       |       |   |   |  | GRSPaV             | 3138-07 (JX559646) | <i>Foveavirus</i>              | WIL47_N22    | 8726  | 369.074  | 95.65%  | 6662/8346 (79.82%)   |
|       |           |           |       |       |   |   |  | GRSPaV             | 3138-07 (JX559646) | <i>Foveavirus</i>              | WIL47_N23    | 8710  | 215.087  | 99.82%  | 8142/8710 (93.48%)   |
|       |           |           |       |       |   |   |  | GRVfV              | Mauzac (KY513701)  | <i>Marafivirus</i> (tentative) | WIL47_N404   | 4019  | 10.897   | 59.69%  | 3427/4017 (85.31%)   |
| WIL48 | 6,642,608 | 6,621,321 | 128.2 | 53212 | 5 | 4 |  | GVA <sup>II</sup>  | Is151 (X75433)     | <i>Vitivirus</i>               | WIL48_N20_SD | 7322  | 116.535  | 93.78%  | 5487/6894 (79.59%)   |
|       |           |           |       |       |   |   |  | GLRaV-3            | NY1 (AF037268)     | <i>Ampelovirus</i>             | WIL48_N4     | 18402 | 631.677  | 99.09%  | 17386/17756 (97.92%) |
|       |           |           |       |       |   |   |  | GRSPaV             | 3138-07 (JX559646) | <i>Foveavirus</i>              | WIL48_N11    | 8711  | 152.874  | 93.18%  | 6509/8131 (80.05%)   |
|       |           |           |       |       |   |   |  | GRSPaV             | 3138-07 (JX559646) | <i>Foveavirus</i>              | WIL48_N12    | 8700  | 68.505   | 99.70%  | 8131/8700 (93.46%)   |
| WIL49 | 8,918,793 | 8,887,686 | 132.7 | 76184 | 5 | 6 |  | GVA <sup>II</sup>  | Is151 (X75433)     | <i>Vitivirus</i>               | WIL49_N29_SD | 7333  | 158.202  | 93.77%  | 5479/6893 (79.49%)   |
|       |           |           |       |       |   |   |  | GLRaV-3            | NY1 (AF037268)     | <i>Ampelovirus</i>             | WIL49_N5     | 18622 | 730.866  | 99.94%  | 17539/17909 (97.93%) |
|       |           |           |       |       |   |   |  | GRSPaV             | 3138-07 (JX559646) | <i>Foveavirus</i>              | WIL49_N12    | 8712  | 299.75   | 95.45%  | 6656/8329 (79.91%)   |
|       |           |           |       |       |   |   |  | GRSPaV             | 3138-07 (JX559646) | <i>Foveavirus</i>              | WIL49_N13    | 8712  | 172.718  | 99.84%  | 8139/8712 (93.42%)   |

|                    |            |           |       |       |   |    |                    |                       |                                   |                             |       |          |         |                         |
|--------------------|------------|-----------|-------|-------|---|----|--------------------|-----------------------|-----------------------------------|-----------------------------|-------|----------|---------|-------------------------|
| WIL50              | 4,070,795  | 4,045,084 | 127   | 28893 | 3 | 7  | GRVfV              | Mauzac<br>(KY513701)  | <i>Marafivirus</i><br>(tentative) | WIL49_N5272                 | 1514  | 5.488    | 22.51%  | 1301/1515<br>(85.87%)   |
|                    |            |           |       |       |   |    | GVA <sup>II</sup>  | Is151<br>(X75433)     | <i>Vitivirus</i>                  | WIL50_N27_S<br>D            | 4284  | 34.486   | 19.59%  | 1156/1440<br>(80.28%)   |
|                    |            |           |       |       |   |    | GRSPaV             | 3138-07<br>(JX559646) | <i>Foveavirus</i>                 | WIL50_N7                    | 8706  | 127.646  | 95.50%  | 6657/8333<br>(79.89%)   |
| WIL53              | 8,291,340  | 8,242,006 | 126.1 | 54153 | 3 | 8  | GVA <sup>II</sup>  | Is151<br>(X75433)     | <i>Vitivirus</i>                  | WIL53_N26_S<br>D            | 7330  | 256.071  | 93.86%  | 5487/6900<br>(79.52%)   |
|                    |            |           |       |       |   |    | GLRaV-<br>3        | NY1<br>(AF037268)     | <i>Ampelovirus</i>                | WIL53_N4                    | 18561 | 1261.987 | 100.00% | 17547/17919<br>(97.92%) |
|                    |            |           |       |       |   |    | GRSPaV             | 3138-07<br>(JX559646) | <i>Foveavirus</i>                 | WIL53_N15                   | 8711  | 95.738   | 99.83%  | 8144/8711<br>(93.49%)   |
|                    |            |           |       |       |   |    | GRSPaV             | 3138-07<br>(JX559646) | <i>Foveavirus</i>                 | WIL53_N16                   | 8704  | 264.03   | 95.45%  | 6638/8329<br>(79.7%)    |
|                    |            |           |       |       |   |    | GRVfV              | Mauzac<br>(KY513701)  | <i>Marafivirus</i><br>(tentative) | WIL53_N433                  | 3087  | 19.299   | 45.57%  | 2622/3067<br>(85.49%)   |
| Shiraz_OR_<br>P5   | 7,412,911  | 7378996   | 126.5 | 45848 | 2 | 8  | GRSPaV             | 3138-07<br>(JX559646) | <i>Foveavirus</i>                 | Shiraz_OR_P5<br>_N18        | 8722  | 1443.013 | 93.14%  | 6507/8127<br>(80.07%)   |
|                    |            |           |       |       |   |    | GRSPaV             | 3138-07<br>(JX559646) | <i>Foveavirus</i>                 | Shiraz_OR_P5<br>_N24        | 8715  | 890.954  | 99.87%  | 8156/8715<br>(93.59%)   |
|                    |            |           |       |       |   |    | GRVfV              | Mauzac<br>(KY513701)  | <i>Marafivirus</i><br>(tentative) | Shiraz_OR_P5<br>_N304       | 4168  | 137.484  | 60.74%  | 3567/4088<br>(87.26%)   |
| Shiraz_OR_<br>P6   | 11,034,624 | 10968905  | 127.2 | 52144 | 3 | 4  | GRSPaV             | 3138-07<br>(JX559646) | <i>Foveavirus</i>                 | Shiraz_OR_P6<br>_N26        | 8802  | 682.444  | 99.97%  | 8162/8723<br>(93.57%)   |
|                    |            |           |       |       |   |    | GRVfV              | Mauzac<br>(KY513701)  | <i>Marafivirus</i><br>(tentative) | Shiraz_OR_P6<br>_N564       | 3718  | 66.938   | 55.35%  | 3183/3725<br>(85.45%)   |
| CabSA125_<br>R3V30 | 7,734,941  | 7673531   | 126.9 | 41987 | 1 | 20 | GVA <sup>II</sup>  | Is151<br>(X75433)     | <i>Vitivirus</i>                  | CabSA125_3R3<br>0_N89_LRD   | 5731  | 222.553  | 71.64%  | 4126/5266<br>(78.35%)   |
|                    |            |           |       |       |   |    | GVA <sup>III</sup> | Is151<br>(X75433)     | <i>Vitivirus</i>                  | CabSA125_3R3<br>0_N1944_LRD | 2218  | 270.229  | 23.15%  | 1368/1702<br>(80.38%)   |
|                    |            |           |       |       |   |    | GLRaV-<br>4/9      | LR106<br>(FJ467503)   | <i>Ampelovirus</i>                | CabSA125_3R3<br>0_N13       | 11333 | 452.9    | 53.14%  | 5745/7349<br>(78.17%)   |

|                 |           |         |       |       |   |    |                    |                                 |                                   |                             |      |         |        |                       |
|-----------------|-----------|---------|-------|-------|---|----|--------------------|---------------------------------|-----------------------------------|-----------------------------|------|---------|--------|-----------------------|
| CabSA125_ R3V44 | 6,838,643 | 6817153 | 128.4 | 49351 | 1 | 11 | GRSPaV             | 3138-07<br>(JX559646)           | <i>Foveavirus</i>                 | CabSA125_3R3<br>0_N21       | 8644 | 706.123 | 99.06% | 8083/8644<br>(93.51%) |
|                 |           |         |       |       |   |    | GRGV               | Graciano-<br>T101<br>(KX171166) | <i>Maculavirus</i><br>(tentative) | CabSA125_3R3<br>0_N8761     | 1008 | 7.688   | 14.28% | 877/980<br>(89.49%)   |
|                 |           |         |       |       |   |    | GVA <sup>II</sup>  | Is151<br>(X75433)               | <i>Vitivirus</i>                  | CabSA125_3R4<br>4_N55_LRD   | 6784 | 153.798 | 86.23% | 5001/6339<br>(78.89%) |
|                 |           |         |       |       |   |    | GVA <sup>III</sup> | Is151<br>(X75433)               | <i>Vitivirus</i>                  | CabSA125_3R4<br>4_N1182_LRD | 2795 | 169.145 | 23.09% | 1357/1697<br>(79.96%) |
|                 |           |         |       |       |   |    | GLRaV-<br>4/9      | LR106<br>(FJ467503)             | <i>Ampelovirus</i>                | CabSA125_3R4<br>4_N46       | 7274 | 218.01  | 51.89% | 5602/7176<br>(78.07%) |
|                 |           |         |       |       |   |    | GRSPaV             | 3138-07<br>(JX559646)           | <i>Foveavirus</i>                 | CabSA125_3R4<br>4_N24       | 8772 | 347.321 | 95.56% | 6648/8339<br>(79.72%) |
|                 |           |         |       |       |   |    | GRSPaV             | 3138-07<br>(JX559646)           | <i>Foveavirus</i>                 | CabSA125_3R4<br>4_N25       | 8710 | 142.797 | 99.82% | 8125/8710<br>(93.28%) |

<sup>1</sup> WIL = Willunga, LC = Langhorne Creek, BV = Barossa Valley, CV= Coombe's Vineyard. All grapevines listed are var. Shiraz except Cabw = Cabernet Sauvignon from Willunga and CabSA125 = Cabernet Sauvignon clone SA125 from Coombe's Vineyard, Merlot = Merlot from Willunga.

<sup>2</sup> Including number of contigs from grapevine yellow speckle viroid 1 and hop stunt viroid.

<sup>3</sup> Percentage of genome covered is calculated based on the pairwise alignment of this contig to the exemplar isolate of this virus using the "Blastn" command previously described.

<sup>4</sup> GRSPaV = grapevine rupestris stem pitting-associated virus, GRVfV = grapevine rupestris vein feathering virus, GLRaV-1, -3 = grapevine leafroll-associated virus 1, and 3, GLRaV-4/5, -4/6, -4/9 = grapevine leafroll-associated virus 4 strains 5, 6 and 9, GVA = grapevine virus A, GVF = grapevine virus F, GRGV= grapevine red globe virus

**Table S7.** Details of grapevine virus A (GVA) isolate sequences used for the phylogenetic analysis.

| GenBank<br>accession No<br>(if available) | Isolate          | Country       | Variety or<br>other host | Sympto<br>m <sup>1</sup> | RdRp <sup>2</sup><br>(ORF1) | MP <sup>2</sup><br>(ORF3) | CP <sup>2</sup><br>(ORF4) | RNA-binding <sup>2</sup><br>(ORF5) | Complete<br>genome <sup>2</sup> |
|-------------------------------------------|------------------|---------------|--------------------------|--------------------------|-----------------------------|---------------------------|---------------------------|------------------------------------|---------------------------------|
| OP752632                                  | BV1_N31_Mild_LRD | Australi<br>a | Shiraz                   | mild<br>LRD              | I                           | I                         | I                         | I&II                               | I                               |
| OP752610                                  | Cabw12_N47_LRD   | Australi<br>a | Cabernet<br>Sauvignon    | LRD                      | II                          | II                        | II                        | I&II                               | II                              |

|          |                |           |                    |     |     |     |     |      |     |
|----------|----------------|-----------|--------------------|-----|-----|-----|-----|------|-----|
| OP752625 | Cabw12_N52_LRD | Australia | Cabernet Sauvignon | LRD | II  | II  | II  | N/A  | II  |
| OP752640 | LC5_N12_SD     | Australia | Shiraz             | SD  | II  | II  | II  | I&II | II  |
| OP752637 | LC6_N19_SD     | Australia | Shiraz             | SD  | II  | II  | II  | I&II | II  |
| OP752631 | LC7_N42_SD     | Australia | Shiraz             | SD  | II  | II  | II  | I&II | II  |
| OP752611 | LC9_N19_SD     | Australia | Shiraz             | SD  | II  | II  | II  | I&II | II  |
| OP752620 | LC10_N33_SD    | Australia | Shiraz             | SD  | II  | II  | II  | I&II | II  |
| OP752618 | LC11_N45_SD    | Australia | Shiraz             | SD  | II  | II  | II  | I&II | II  |
| OP752639 | LC13_N31_SD    | Australia | Shiraz             | SD  | II  | II  | II  | I&II | II  |
| OP752616 | LC14_N49_SD    | Australia | Shiraz             | SD  | II  | II  | II  | I&II | II  |
| OP752628 | LC14_N51_SD    | Australia | Shiraz             | SD  | II  | II  | II  | I&II | II  |
| OP752613 | WIL1_N53_SD    | Australia | Shiraz             | SD  | II  | II  | II  | I&II | II  |
| OP752635 | WIL1_N54_SD    | Australia | Shiraz             | SD  | III | III | III | III  | III |
| OP752633 | WIL2_N36_SD    | Australia | Shiraz             | SD  | II  | II  | II  | I&II | II  |
| OP752608 | WIL2_N40_SD    | Australia | Shiraz             | SD  | III | III | III | N/A  | III |
| OP752609 | WIL3_N27_SD    | Australia | Shiraz             | SD  | III | III | III | III  | III |
| OP752623 | WIL3_N29_SD    | Australia | Shiraz             | SD  | II  | II  | II  | I&II | II  |

|          |                |           |                    |     |     |     |     |      |     |
|----------|----------------|-----------|--------------------|-----|-----|-----|-----|------|-----|
| OP752626 | WIL4_N28_SD    | Australia | Shiraz             | SD  | II  | II  | II  | I&II | II  |
| OP752621 | WIL5_N25_SD    | Australia | Shiraz             | SD  | II  | II  | II  | I&II | II  |
| OP752642 | WIL6_N29_SD    | Australia | Shiraz             | SD  | II  | II  | II  | I&II | II  |
| OP752629 | WIL7_N29_SD    | Australia | Shiraz             | SD  | II  | II  | II  | I&II | II  |
| OP752615 | WIL8_N27_SD    | Australia | Shiraz             | SD  | II  | II  | II  | I&II | II  |
| OP752619 | WIL8_N28_SD    | Australia | Shiraz             | SD  | III | III | III | III  | III |
| OP752622 | WIL9_N31_LRD   | Australia | Shiraz             | LRD | III | III | III | III  | III |
| OP752612 | WIL10_N41_LRD  | Australia | Shiraz             | LRD | III | III | III | III  | III |
| OP752641 | WIL12_N33_LRD  | Australia | Shiraz             | LRD | III | III | III | III  | III |
| OP752638 | WIL13_N17_LRD  | Australia | Shiraz             | LRD | III | III | III | III  | III |
| OP752624 | WIL47_N43_SD   | Australia | Shiraz             | LRD | III | III | III | III  | III |
| OP752617 | WIL48_N20_SD   | Australia | Shiraz             | LRD | II  | II  | II  | I&II | II  |
| OP752636 | WIL49_N29_SD   | Australia | Shiraz             | LRD | II  | II  | II  | I&II | II  |
| OP752627 | WIL53_N26_SD   | Australia | Shiraz             | LRD | II  | II  | II  | I&II | II  |
| OP752614 | Cabw11_N36_LRD | Australia | Cabernet Sauvignon | LRD | II  | II  | II  | I&II | II  |
| OP752634 | Cabw1_N38_LRD  | Australia | Cabernet Sauvignon | LRD | III | III | III | III  | III |

|          |                |                 |                                  |                     |     |     |     |      |     |
|----------|----------------|-----------------|----------------------------------|---------------------|-----|-----|-----|------|-----|
| DQ855085 | MSH18-1        | SouthAf<br>rica | Shiraz                           | SD-<br>affected     | N/A | N/A | I   | I&II | N/A |
| KF013755 | BVPN1-21c      | USA             | Pinot Noir                       | unknow<br>n         | N/A | N/A | I   | N/A  | N/A |
| DQ855088 | P163-1         | SouthAf<br>rica | Cinsaut Blanc                    | SD-<br>negativ<br>e | N/A | III | III | III  | III |
| DQ787959 | GTR1-1         | SouthAf<br>rica | Shiraz                           | SD-<br>negativ<br>e | III | III | III | III  | III |
| DQ855086 | GTR1-2         | SouthAf<br>rica | Shiraz                           | SD-<br>negativ<br>e | II  | II  | II  | N/A  | II  |
| AF441235 | JP98           | SouthAf<br>rica | Shiraz                           | SD-<br>affected     | N/A | N/A | II  | I&II | N/A |
| MT070962 | LC1-2          | Australi<br>a   | Shiraz                           | SD                  | II  | II  | II  | N/A  | II  |
| MT070963 | LC1-1          | Australi<br>a   | Shiraz                           | SD                  | II  | II  | II  | II   | II  |
| MT070959 | Malbec-Richter | Australi<br>a   | Malbec                           | SD                  | N/A | N/A | II  | N/A  | N/A |
| DQ855087 | BMo32-1        | SouthAf<br>rica | Merlot                           | SD-<br>affected     | II  | II  | II  | I&II | II  |
| DQ855083 | KWVMo4-1       | SouthAf<br>rica | Merlot                           | SD-<br>affected     | II  | II  | II  | I&II | II  |
| DQ855082 | P163-M5        | SouthAf<br>rica | Cinsaut Blanc                    | SD-<br>affected     | II  | II  | II  | I&II | II  |
| AY244516 | pGR-5          | SouthAf<br>rica | <i>Nicotiana<br/>benthamiana</i> | SD-<br>affected     | I   | I   | I   | N/A  | I   |
| AF007415 | PA3            | SouthAf<br>rica | <i>N. benthamiana</i>            | SD-<br>affected     | I   | I   | I   | I&II | I   |

|          |                |           |                    |             |     |     |    |      |     |
|----------|----------------|-----------|--------------------|-------------|-----|-----|----|------|-----|
| MT070960 | BV1-2          | Australia | Shiraz             | SD-negative | N/A | N/A | I  | N/A  | N/A |
| MT070961 | BV1-1          | Australia | Shiraz             | SD-negative | N/A | I   | I  | I&II | N/A |
| MG717802 | Y170           | Armenia   | Ambarry            | unknown     | N/A | N/A | I  | N/A  | N/A |
| KF013847 | PACF94-142-c07 | USA       | Cabernet Franc     | unknown     | N/A | N/A | I  | N/A  | N/A |
| JF754577 | LN155          | China     | Golden finger      | unknown     | N/A | N/A | I  | N/A  | N/A |
| KF013785 | H6TM2-3-c11    | USA       | Tamar S1           | unknown     | N/A | N/A | II | N/A  | N/A |
| KF013833 | LVCS92-06      | USA       | Cabernet Sauvignon | unknown     | N/A | N/A | I  | N/A  | N/A |
| KF013764 | CBPR116-c03    | USA       | Primitivo CL4      | unknown     | N/A | N/A | I  | N/A  | N/A |
| KF013840 | LVMB92-10c11   | USA       | Malbec             | unknown     | N/A | N/A | I  | N/A  | N/A |
| EU008561 | MT25-7         | Czech     | Muller Thurgau     | unknown     | N/A | I   | I  | N/A  | N/A |
| EU008560 | MT43-25        | Czech     | Muller Thurgau     | unknown     | N/A | N/A | I  | N/A  | N/A |
| MG717800 | Y170           | Armenia   | Ambarry            | unknown     | N/A | N/A | I  | N/A  | N/A |
| KF594432 | 2              | Macedonia | Vranec variety     | unknown     | N/A | N/A | I  | I&II | N/A |
| KM233029 | Rc3-6          | Portugal  | Ricoca             | unknown     | N/A | N/A | I  | I&II | N/A |
| MK404721 | TT2017-74-53   | France    | Pinot Noir         | unknown     | I   | I   | I  | N/A  | I   |

|          |              |             |                |             |     |     |    |      |     |
|----------|--------------|-------------|----------------|-------------|-----|-----|----|------|-----|
| KM233033 | S3-1         | Portugal    | Sousao         | unknown     | N/A | N/A | I  | I&II | N/A |
| JN860997 | IH8          | Poland      | Vitis vinifera | unknown     | N/A | N/A | I  | N/A  | N/A |
| JN860998 | IH11         | Poland      | Vitis sp.      | unknown     | N/A | N/A | I  | N/A  | N/A |
| MK404720 | TT2017-74-47 | France      | Pinot Noir     | unknown     | I   | I   | I  | N/A  | I   |
| KC962564 | I327-5       | SouthAfrica | Shiraz         | SD-negative | I   | I   | I  | I&II | I   |
| KM233003 | TM3-1        | Portugal    | Tinta Martins  | unknown     | N/A | N/A | I  | I&II | N/A |
| KM232996 | BT3-11       | Portugal    | Bastardo Tinto | unknown     | N/A | N/A | I  | N/A  | N/A |
| KF013766 | CBPR116-c12  | USA         | Primitivo CL4  | unknown     | N/A | N/A | I  | N/A  | N/A |
| MF979533 | VB-108       | Croatia     | Babica         | unknown     | I   | I   | I  | I&II | I   |
| KX828703 | TRAJ2-BR     | Brazil      | Trajadura      | unknown     | N/A | I   | I  | I&II | I   |
| DQ855081 | GTR1SD-1     | SouthAfrica | Shiraz         | SD-affected | II  | II  | II | I&II | II  |
| DQ855084 | GTG11-1      | SouthAfrica | Shiraz         | SD-negative | I   | I   | I  | I&II | I   |
| X75433   | Is-151       | Italy       | benthamiana    | unknown     | I   | I   | I  | I&II | I   |
| MK404722 | TT2017-79    | France      | Pinot Noir     | unknown     | I   | I   | I  | N/A  | I   |
| MG925333 | P70          | France      | Pinot noir     | unknown     | N/A | I   | I  | I&II | I   |

|          |            |             |                    |             |     |     |     |      |     |
|----------|------------|-------------|--------------------|-------------|-----|-----|-----|------|-----|
| JX559641 | 3138-03    | Canada      | Vitis vinifera     | unknown     | III | III | III | III  | III |
| LC617941 | g13-C57*   | Japan       | Vitis sp.          | unknown     | III | III | III | I&II | III |
| LC617944 | g13-C274   | Japan       | Vitis sp.          | unknown     | I   | I   | I   | I&II | I   |
| KF013813 | LV94-02    | USA         | Vitis vinifera     | unknown     | N/A | N/A | I   | N/A  | N/A |
| MG977014 | p26        | Iran        | Vitis vinifera     | unknown     | N/A | N/A | I   | N/A  | N/A |
| KF013799 | SLWZF1-2c1 | USA         | Zinfandel          | unknown     | N/A | N/A | I   | N/A  | N/A |
| JF754576 | LN141      | China       | Mars Seedless      | unknown     | N/A | N/A | I   | N/A  | N/A |
| AF441234 | 92-788     | SouthAfrica | Cabernet Sauvignon | SD-affected | N/A | N/A | I   | I&II | N/A |
| KM233013 | MI3-15     | Portugal    | Malandra           | unknown     | N/A | N/A | I   | I&II | N/A |
| KM233012 | MI3-12     | Portugal    | Malandra           | unknown     | N/A | N/A | I   | I&II | N/A |
| KF594433 | 3          | Macedonia   | Frankovka          | unknown     | N/A | N/A | I   | I&II | N/A |
| KF594434 | 4          | Macedonia   | Vranec             | unknown     | N/A | N/A | I   | I&II | N/A |
| KF594435 | 5          | Macedonia   | Vranec             | unknown     | N/A | N/A | I   | I&II | N/A |
| AB039841 |            | Japan       | Vitis sp.          | unknown     | N/A | N/A | I   | N/A  | N/A |
| AF441236 | P163-1     | SouthAfrica | Cinsaut Blanc      | unknown     | III | N/A | III | III  | N/A |
| DQ911145 | LQ58       | China       | Vitis sp           | unknown     | N/A | N/A | III | N/A  | N/A |

|          |           |        |                |         |     |     |     |     |     |
|----------|-----------|--------|----------------|---------|-----|-----|-----|-----|-----|
| JF754566 | LN9       | China  | Vitis vinifera | unknown | N/A | N/A | I   | N/A | N/A |
| JF754567 | LN37      | China  | Vitis vinifera | unknown | N/A | N/A | I   | N/A | N/A |
| JF754568 | LN43      | China  | Autumn black   | unknown | N/A | N/A | I   | N/A | N/A |
| JF754569 | LN50      | China  | Vitis vinifera | unknown | N/A | N/A | I   | N/A | N/A |
| JF754570 | LN60      | China  | Rosario Bianco | unknown | N/A | N/A | I   | N/A | N/A |
| JF754571 | LN68      | China  | Yatomi Rosa    | unknown | N/A | N/A | I   | N/A | N/A |
| JF754572 | LN107     | China  | Renitaka       | unknown | N/A | N/A | I   | N/A | N/A |
| JF754573 | LN121     | China  | Vitis vinifera | unknown | N/A | N/A | I   | N/A | N/A |
| JF754574 | LN126     | China  | Vitis vinifera | unknown | N/A | N/A | I   | N/A | N/A |
| JF754575 | LN136     | China  | Vitis vinifera | unknown | N/A | N/A | I   | N/A | N/A |
| JF754578 | LN68-2    | China  | Yatomi Rosa    | unknown | N/A | N/A | I   | N/A | N/A |
| JN565033 | IH10      | Poland | Vitis vinifera | unknown | N/A | N/A | I   | N/A | N/A |
| JN860999 | IH23      | Poland | Vitis vinifera | unknown | N/A | N/A | I   | N/A | N/A |
| JN861000 | IH27      | Poland | Vitis vinifera | unknown | N/A | N/A | I   | N/A | N/A |
| KF013756 | BVPN1-2c  | USA    | Pinot Noir     | unknown | N/A | N/A | I   | N/A | N/A |
| KF013757 | BVPN1-11G | USA    | Pinot Noir     | unknown | N/A | N/A | III | N/A | N/A |

|          |             |     |                    |         |     |     |     |     |     |
|----------|-------------|-----|--------------------|---------|-----|-----|-----|-----|-----|
| KF013758 | BVPN2-8c    | USA | Pinot Noir         | unknown | N/A | N/A | III | N/A | N/A |
| KF013759 | BVPN2-13c   | USA | Pinot Noir         | unknown | N/A | N/A | I   | N/A | N/A |
| KF013760 | BVPN2-b15E  | USA | Pinot Noir         | unknown | N/A | N/A | II  | N/A | N/A |
| KF013761 | BVPN2-b23E  | USA | Pinot Noir         | unknown | N/A | N/A | II  | N/A | N/A |
| KF013762 | BVPN2-b26B  | USA | Pinot Noir         | unknown | N/A | N/A | I   | N/A | N/A |
| KF013763 | CBPR116-2c  | USA | Primitivo CL 4     | unknown | N/A | N/A | III | N/A | N/A |
| KF013765 | CBPR116-c09 | USA | Primitivo CL 4     | unknown | N/A | N/A | I   | N/A | N/A |
| KF013767 | CBSM119-2c  | USA | Sami S1            | unknown | N/A | N/A | I   | N/A | N/A |
| KF013768 | CBSM119-3c  | USA | Sami S1            | unknown | N/A | N/A | III | N/A | N/A |
| KF013770 | CBSM119_c08 | USA | Sami S2            | unknown | N/A | N/A | I   | N/A | N/A |
| KF013771 | CSOT1_14c   | USA | Cabernet Sauvignon | unknown | N/A | N/A | I   | N/A | N/A |
| KF013772 | CSOT1_4c    | USA | Cabernet Sauvignon | unknown | N/A | N/A | II  | N/A | N/A |
| KF013774 | CSOT1-b50H  | USA | Cabernet Sauvignon | unknown | N/A | N/A | III | N/A | N/A |
| KF013775 | CSOT2-19c   | USA | Cabernet Sauvignon | unknown | N/A | N/A | I   | N/A | N/A |
| KF013776 | CSOT2-2c    | USA | Cabernet Sauvignon | unknown | N/A | N/A | III | N/A | N/A |
| KF013777 | CSOT2-2G    | USA | Cabernet Sauvignon | unknown | N/A | N/A | III | N/A | N/A |

|          |             |     |                    |         |     |     |     |     |     |
|----------|-------------|-----|--------------------|---------|-----|-----|-----|-----|-----|
| KF013779 | H6TM2-3_2c2 | USA | Tamar S1           | unknown | N/A | N/A | III | N/A | N/A |
| KF013780 | H6TM2-3_3c1 | USA | Tamar S1           | unknown | N/A | N/A | II  | N/A | N/A |
| KF013781 | H6TM2-3_3c2 | USA | Tamar S1           | unknown | N/A | N/A | I   | N/A | N/A |
| KF013782 | H6TM2-3_c01 | USA | Tamar S1           | unknown | N/A | N/A | II  | N/A | N/A |
| KF013783 | H6TM2-3_c07 | USA | Tamar S1           | unknown | N/A | N/A | III | N/A | N/A |
| KF013784 | H6TM2-3_c09 | USA | Tamar S1           | unknown | N/A | N/A | III | N/A | N/A |
| KF013786 | HHCS1_17c   | USA | Cabernet Sauvignon | unknown | N/A | N/A | III | N/A | N/A |
| KF013787 | HHCS1_4c    | USA | Cabernet Sauvignon | unknown | N/A | N/A | II  | N/A | N/A |
| KF013788 | HHCS2_13c   | USA | Cabernet Sauvignon | unknown | N/A | N/A | III | N/A | N/A |
| KF013789 | HHCS2_6c    | USA | Cabernet Sauvignon | unknown | N/A | N/A | II  | N/A | N/A |
| KF013790 | HHCS3_2c    | USA | Cabernet Sauvignon | unknown | N/A | N/A | I   | N/A | N/A |
| KF013791 | HHCS3_8c    | USA | Cabernet Sauvignon | unknown | N/A | N/A | III | N/A | N/A |
| KF013792 | HHCS3_7c    | USA | Cabernet Sauvignon | unknown | N/A | N/A | II  | N/A | N/A |
| KF013793 | HHPN1_2c2   | USA | Pinot Noir         | unknown | N/A | N/A | I   | N/A | N/A |
| KF013794 | HHPN1_9c    | USA | Pinot Noir         | unknown | N/A | N/A | III | N/A | N/A |
| KF013795 | HHPN1_16c   | USA | Pinot Noir         | unknown | N/A | N/A | I   | N/A | N/A |

|          |             |     |                |         |     |     |     |     |     |
|----------|-------------|-----|----------------|---------|-----|-----|-----|-----|-----|
| KF013796 | HHPN1-115B  | USA | Pinot Noir     | unknown | N/A | N/A | I   | N/A | N/A |
| KF013797 | HRPCH1_10c  | USA | Chardonnay     | unknown | N/A | N/A | I   | N/A | N/A |
| KF013798 | SLWZF1-11c  | USA | Zinfandel      | unknown | N/A | N/A | III | N/A | N/A |
| KF013800 | SLWZF1-2c2  | USA | Zinfandel      | unknown | N/A | N/A | II  | N/A | N/A |
| KF013801 | SLWZF1-5c2  | USA | Zinfandel      | unknown | N/A | N/A | III | N/A | N/A |
| KF013802 | SLWZF1-105E | USA | Zinfandel      | unknown | N/A | N/A | II  | N/A | N/A |
| KF013803 | SLWZF1-5D   | USA | Zinfandel      | unknown | N/A | N/A | I   | N/A | N/A |
| KF013804 | SLWZF1-6    | USA | Zinfandel      | unknown | N/A | N/A | II  | N/A | N/A |
| KF013806 | VHLM1_5c    | USA | Lemberger      | unknown | N/A | N/A | I   | N/A | N/A |
| KF013807 | VHLM1_2c    | USA | Lemberger      | unknown | N/A | N/A | I   | N/A | N/A |
| KF013808 | VHLM1-8D    | USA | Lemberger      | unknown | N/A | N/A | I   | N/A | N/A |
| KF013809 | VHLM1-9D    | USA | Lemberger      | unknown | N/A | N/A | I   | N/A | N/A |
| KF013810 | LREP100_9c  | USA | Emperor        | unknown | N/A | N/A | III | N/A | N/A |
| KF013811 | LREP100_c03 | USA | Emperor        | unknown | N/A | N/A | III | N/A | N/A |
| KF013812 | LV94-02_2c  | USA | Vitis vinifera | unknown | N/A | N/A | III | N/A | N/A |
| KF013814 | LV94-02_c04 | USA | Vitis vinifera | unknown | N/A | N/A | I   | N/A | N/A |

|          |               |     |                |         |     |     |     |     |     |
|----------|---------------|-----|----------------|---------|-----|-----|-----|-----|-----|
| KF013815 | LV94-02_c09   | USA | Vitis vinifera | unknown | N/A | N/A | I   | N/A | N/A |
| KF013816 | LVCH92-04_4c2 | USA | Chardonnay     | unknown | N/A | N/A | III | N/A | N/A |
| KF013817 | LVCH92-04_7c  | USA | Chardonnay     | unknown | N/A | N/A | III | N/A | N/A |
| KF013818 | LVCH92-04_c06 | USA | Chardonnay     | unknown | N/A | N/A | III | N/A | N/A |
| KF013819 | LVCH92-07_3c  | USA | Chardonnay     | unknown | N/A | N/A | III | N/A | N/A |
| KF013820 | LVCH92-07_2c1 | USA | Chardonnay     | unknown | N/A | N/A | III | N/A | N/A |
| KF013821 | LVCH92-07_2c2 | USA | Chardonnay     | unknown | N/A | N/A | III | N/A | N/A |
| KF013822 | LVCH92-07_c05 | USA | Chardonnay     | unknown | N/A | N/A | III | N/A | N/A |
| KF013823 | LVCH92-07_c09 | USA | Chardonnay     | unknown | N/A | N/A | III | N/A | N/A |
| KF013824 | LVCH92-09_2c1 | USA | Chardonnay     | unknown | N/A | N/A | III | N/A | N/A |
| KF013825 | LVCH92-09_2c2 | USA | Chardonnay     | unknown | N/A | N/A | III | N/A | N/A |
| KF013826 | LVCH92-09_3c  | USA | Chardonnay     | unknown | N/A | N/A | II  | N/A | N/A |
| KF013827 | LVCH92-09_c07 | USA | Chardonnay     | unknown | N/A | N/A | III | N/A | N/A |
| KF013828 | LVCH94-04_10c | USA | Chardonnay     | unknown | N/A | N/A | I   | N/A | N/A |
| KF013829 | LVCH94-04_c11 | USA | Chardonnay     | unknown | N/A | N/A | III | N/A | N/A |
| KF013830 | LVCS92-06_2c1 | USA | Chardonnay     | unknown | N/A | N/A | I   | N/A | N/A |

|          |                |     |                |         |     |     |     |     |     |
|----------|----------------|-----|----------------|---------|-----|-----|-----|-----|-----|
| KF013831 | LVCS92-06_3c2  | USA | Chardonnay     | unknown | N/A | N/A | III | N/A | N/A |
| KF013832 | LVCS92-06_2c2  | USA | Chardonnay     | unknown | N/A | N/A | II  | N/A | N/A |
| KF013834 | LVCS92-06_c04  | USA | Chardonnay     | unknown | N/A | N/A | III | N/A | N/A |
| KF013835 | LVCS92-06_c08  | USA | Chardonnay     | unknown | N/A | N/A | III | N/A | N/A |
| KF013836 | LVMB92-10_5c   | USA | Malbec         | unknown | N/A | N/A | I   | N/A | N/A |
| KF013837 | LVMB92-10_2c   | USA | Malbec         | unknown | N/A | N/A | III | N/A | N/A |
| KF013838 | LVMB92-10_c05  | USA | Malbec         | unknown | N/A | N/A | I   | N/A | N/A |
| KF013839 | LVMB92-10_c08  | USA | Malbec         | unknown | N/A | N/A | I   | N/A | N/A |
| KF013841 | LVSB91-02_11c  | USA | Malbec         | unknown | N/A | N/A | I   | N/A | N/A |
| KF013842 | LVZT93-09_12c  | USA | Zante          | unknown | N/A | N/A | II  | N/A | N/A |
| KF013843 | PACF94-142_3c  | USA | Cabernet Franc | unknown | N/A | N/A | I   | N/A | N/A |
| KF013844 | PACF94-142_4c  | USA | Cabernet Franc | unknown | N/A | N/A | III | N/A | N/A |
| KF013845 | PACF94-142_c02 | USA | Cabernet Franc | unknown | N/A | N/A | III | N/A | N/A |
| KF013846 | PACF94-142_c06 | USA | Cabernet Franc | unknown | N/A | N/A | I   | N/A | N/A |
| KF013848 | PACF94-142_c08 | USA | Cabernet Franc | unknown | N/A | N/A | I   | N/A | N/A |
| KF013849 | PACF94-142_c12 | USA | Cabernet Franc | unknown | N/A | N/A | I   | N/A | N/A |

|          |                |             |                |         |     |     |     |     |     |
|----------|----------------|-------------|----------------|---------|-----|-----|-----|-----|-----|
| KF013850 | PLCF95-413_4c  | USA         | Cabernet Franc | unknown | N/A | N/A | III | N/A | N/A |
| KF013851 | PLCF95-413_c02 | USA         | Cabernet Franc | unknown | N/A | N/A | I   | N/A | N/A |
| KF013852 | PLCF95-413_c05 | USA         | Cabernet Franc | unknown | N/A | N/A | III | N/A | N/A |
| KF013853 | PLCF95-413_c06 | USA         | Cabernet Franc | unknown | N/A | N/A | II  | N/A | N/A |
| KF013854 | PLCF95-413_c10 | USA         | Cabernet Franc | unknown | N/A | N/A | II  | N/A | N/A |
| LC387465 | KGA            | South Korea | Vitis sp.      | unknown | N/A | N/A | I   | N/A | N/A |
| LK937667 | K4             | Greece      | Aidani white   | unknown | N/A | N/A | III | N/A | N/A |
| LK937668 | K12            | Greece      | Aidani red     | unknown | N/A | N/A | III | N/A | N/A |
| LK937669 | T2-11          | Greece      | Koumariano     | unknown | N/A | N/A | III | N/A | N/A |
| LK937670 | D9             | Greece      | Potamisi       | unknown | N/A | N/A | III | N/A | N/A |
| LK937671 | P4-11          | Greece      | Aidani white   | unknown | N/A | N/A | I   | N/A | N/A |
| LK937672 | F15            | Greece      | Kakomauro      | unknown | N/A | N/A | III | N/A | N/A |
| LK937673 | 5Y             | Greece      | 140 Ru         | unknown | N/A | N/A | I   | N/A | N/A |
| LK937674 | 64             | Greece      | Vertzami       | unknown | N/A | N/A | I   | N/A | N/A |
| LK937675 | 72-1           | Greece      | Cabernet franc | unknown | N/A | N/A | III | N/A | N/A |
| LK937676 | 73             | Greece      | Roditis        | unknown | N/A | N/A | I   | N/A | N/A |

|          |        |          |                       |         |     |     |     |      |     |
|----------|--------|----------|-----------------------|---------|-----|-----|-----|------|-----|
| LK937677 | 75-1   | Greece   | Cabernet              | unknown | N/A | N/A | I   | N/A  | N/A |
| LK937678 | 89-3   | Greece   | Attiki                | unknown | N/A | N/A | I   | N/A  | N/A |
| LK937679 | 95-4   | Greece   | Roditis               | unknown | N/A | N/A | I   | N/A  | N/A |
| LK937680 | P14    | Greece   | Korithiaki<br>stafida | unknown | N/A | N/A | I   | N/A  | N/A |
| LR794210 | 73a    | Greece   | Roditis               | unknown | N/A | N/A | III | N/A  | N/A |
| LR794211 | K11    | Greece   | Mandilaria            | unknown | N/A | N/A | III | N/A  | N/A |
| LR794212 | D24    | Greece   | Karabraimi            | unknown | N/A | N/A | III | N/A  | N/A |
| MG977013 | p25    | Iran     | Vitis vinifera        | unknown | N/A | N/A | I   | N/A  | N/A |
| KM232988 | TL3-5  | Portugal | Tinta Lameira         | unknown | N/A | N/A | I   | N/A  | N/A |
| KM232989 | TL3-7  | Portugal | Tinta Lameira         | unknown | N/A | N/A | I   | N/A  | N/A |
| KM232990 | TL3-13 | Portugal | Tinta Lameira         | unknown | N/A | N/A | I   | N/A  | N/A |
| KM232991 | TL3-31 | Portugal | Tinta Lameira         | unknown | N/A | N/A | I   | N/A  | N/A |
| KM233034 | S3-4   | Portugal | Sousao                | unknown | N/A | N/A | I   | I&II | N/A |
| KM233033 | S3-1   | Portugal | Sousao                | unknown | N/A | N/A | I   | I&II | N/A |
| KM233032 | Rc3-1  | Portugal | Ricoca                | unknown | N/A | N/A | III | III  | N/A |
| KM233031 | Rc3-12 | Portugal | Ricoca                | unknown | N/A | N/A | I   | I&II | N/A |

|          |        |          |                |         |     |     |     |      |     |
|----------|--------|----------|----------------|---------|-----|-----|-----|------|-----|
| KM233030 | Rc3-7  | Portugal | Ricoca         | unknown | N/A | N/A | I   | I&II | N/A |
| KM233029 | Rc3-6  | Portugal | Ricoca         | unknown | N/A | N/A | I   | I&II | N/A |
| KM233028 | Rs3-16 | Portugal | Roseira        | unknown | N/A | N/A | I   | I&II | N/A |
| KM233027 | Rs3-15 | Portugal | Roseira        | unknown | N/A | N/A | III | III  | N/A |
| KM233026 | Rs3-10 | Portugal | Roseira        | unknown | N/A | N/A | III | III  | N/A |
| KM233025 | Rs3-7  | Portugal | Roseira        | unknown | N/A | N/A | I   | I&II | N/A |
| KM233024 | Rs3-6  | Portugal | Roseira        | unknown | N/A | N/A | I   | I&II | N/A |
| KM233023 | Rs3-5  | Portugal | Roseira        | unknown | N/A | N/A | I   | I&II | N/A |
| KM233022 | Rs3-3  | Portugal | Roseira        | unknown | N/A | N/A | I   | I&II | N/A |
| KM233021 | Rs3-2  | Portugal | Roseira        | unknown | N/A | N/A | I   | I&II | N/A |
| KM233020 | Rs3-1  | Portugal | Roseira        | unknown | N/A | N/A | I   | I&II | N/A |
| KM233019 | MI3-3  | Portugal | Roseira        | unknown | N/A | N/A | III | III  | N/A |
| KM232992 | BT3-1  | Portugal | Bastardo Tinto | unknown | N/A | N/A | I   | N/A  | N/A |
| KM232993 | BT3-3  | Portugal | Bastardo Tinto | unknown | N/A | N/A | I   | N/A  | N/A |
| KM232994 | BT3-6  | Portugal | Bastardo Tinto | unknown | N/A | N/A | I   | N/A  | N/A |
| KM232995 | BT3-9  | Portugal | Bastardo Tinto | unknown | N/A | N/A | I   | N/A  | N/A |

|          |         |          |                |         |     |     |     |      |     |
|----------|---------|----------|----------------|---------|-----|-----|-----|------|-----|
| KM232997 | BT3-14  | Portugal | Bastardo Tinto | unknown | N/A | N/A | I   | N/A  | N/A |
| KM232998 | BT3-33  | Portugal | Bastardo Tinto | unknown | N/A | N/A | I   | N/A  | N/A |
| KM232999 | TF3-6   | Portugal | Tinta Ferreira | unknown | N/A | N/A | I   | I&II | N/A |
| KM233000 | TF3-3   | Portugal | Tinta Ferreira | unknown | N/A | N/A | III | III  | N/A |
| KM233001 | TF3-5   | Portugal | Tinta Ferreira | unknown | N/A | N/A | III | III  | N/A |
| KM233002 | TF3-7   | Portugal | Tinta Ferreira | unknown | N/A | N/A | III | III  | N/A |
| KM233004 | TM3-5   | Portugal | Tinta Martins  | unknown | N/A | N/A | I   | I&II | N/A |
| KM233005 | TM3-6   | Portugal | Tinta Martins  | unknown | N/A | N/A | I   | I&II | N/A |
| KM233006 | TM3-4   | Portugal | Tinta Martins  | unknown | N/A | N/A | III | I&II | N/A |
| KM233007 | MI3-1   | Portugal | Malandra       | unknown | N/A | N/A | I   | I&II | N/A |
| KM233008 | MI3-4   | Portugal | Malandra       | unknown | N/A | N/A | I   | I&II | N/A |
| KM233009 | MI3-5   | Portugal | Malandra       | unknown | N/A | N/A | I   | I&II | N/A |
| KM233010 | MI3-10  | Portugal | Malandra       | unknown | N/A | N/A | I   | I&II | N/A |
| KM233011 | MI3-11  | Portugal | Malandra       | unknown | N/A | N/A | I   | I&II | N/A |
| KM233014 | MI3-16A | Portugal | Malandra       | unknown | N/A | N/A | I   | I&II | N/A |
| KM233015 | MI3-9   | Portugal | Malandra       | unknown | N/A | N/A | II  | I&II | N/A |

|          |         |              |               |             |     |     |     |      |     |
|----------|---------|--------------|---------------|-------------|-----|-----|-----|------|-----|
| KM233016 | MI3-7   | Portugal     | Malandra      | unknown     | N/A | N/A | III | III  | N/A |
| KM233017 | MI3-13  | Portugal     | Malandra      | unknown     | N/A | N/A | III | III  | N/A |
| KM233018 | MI3-14  | Portugal     | Malandra      | unknown     | N/A | N/A | III | III  | N/A |
| MK982553 | M5v     | South Africa | Cinsaut Blanc | SD-affected | II  | II  | II  | I&II | II  |
| MG717789 | Y245-1  | Turkey       | Karasakis     | unknown     | N/A | N/A | I   | N/A  | N/A |
| MG717790 | Y245-2  | Turkey       | Karasakis     | unknown     | N/A | N/A | I   | N/A  | N/A |
| MG717791 | Y273-1  | Turkey       | Narince       | unknown     | N/A | N/A | I   | N/A  | N/A |
| MG717792 | Y273-2  | Turkey       | Narince       | unknown     | N/A | N/A | I   | N/A  | N/A |
| MG717793 | Y273-3  | Turkey       | Narince       | unknown     | N/A | N/A | I   | N/A  | N/A |
| MG717794 | Y273-4  | Turkey       | Narince       | unknown     | N/A | N/A | I   | N/A  | N/A |
| MG717795 | Y307-1  | Ukraine      | Tanagos Kosky | unknown     | N/A | N/A | I   | N/A  | N/A |
| MG717796 | Y307-2  | Ukraine      | Tanagos Kosky | unknown     | N/A | N/A | I   | N/A  | N/A |
| MG717797 | Y307-4  | Ukraine      | Tanagos Kosky | unknown     | N/A | N/A | I   | N/A  | N/A |
| MG717798 | Y161-1  | Lebanon      | Agmi Assouad  | unknown     | N/A | N/A | III | N/A  | N/A |
| MG717799 | Y161-2  | Lebanon      | Agmi Assouad  | unknown     | N/A | N/A | I   | N/A  | N/A |
| MG717801 | Y170- 2 | Armenia      | Ambarry       | unknown     | N/A | N/A | I   | N/A  | N/A |

|          |          |            |               |         |     |     |     |     |     |
|----------|----------|------------|---------------|---------|-----|-----|-----|-----|-----|
| MG717803 | Y170- 4  | Armenia    | Ambarry       | unknown | N/A | N/A | I   | N/A | N/A |
| MG717804 | Y170- 5  | Armenia    | Ambarry       | unknown | N/A | N/A | I   | N/A | N/A |
| MG717805 | Y170- 6  | Armenia    | Ambarry       | unknown | N/A | N/A | I   | N/A | N/A |
| MG717806 | Y172-1   | Azerbaijan | Ara Hirna     | unknown | N/A | N/A | I   | N/A | N/A |
| MG717807 | Y172-2   | Azerbaijan | Ara Hirna     | unknown | N/A | N/A | I   | N/A | N/A |
| MG717808 | Y172-3   | Azerbaijan | Ara Hirna     | unknown | N/A | N/A | I   | N/A | N/A |
| MG717809 | Y172-4   | Azerbaijan | Ara Hirna     | unknown | N/A | N/A | I   | N/A | N/A |
| MG717810 | 95-177-1 | Italy      | Italia        | unknown | N/A | N/A | I   | N/A | N/A |
| MG717811 | 95-177-2 | Italy      | Italia        | unknown | N/A | N/A | I   | N/A | N/A |
| MG717812 | 95-177-3 | Italy      | Italia        | unknown | N/A | N/A | I   | N/A | N/A |
| MG717813 | 95-177-4 | Italy      | Italia        | unknown | N/A | N/A | I   | N/A | N/A |
| MG717814 | Y199-1   | USA        | Black Monucca | unknown | N/A | N/A | III | N/A | N/A |
| MG717815 | Y199-3   | USA        | Black Monucca | unknown | N/A | N/A | III | N/A | N/A |
| MG717816 | Y199-4   | USA        | Black Monucca | unknown | N/A | N/A | III | N/A | N/A |
| MG717817 | Y217-1   | USA        | Emperor       | unknown | N/A | N/A | III | N/A | N/A |
| MG717818 | Y217-2   | USA        | Emperor       | unknown | N/A | N/A | III | N/A | N/A |

|          |         |            |                    |         |     |     |     |     |     |
|----------|---------|------------|--------------------|---------|-----|-----|-----|-----|-----|
| MG717819 | Y217-3  | USA        | Emperor            | unknown | N/A | N/A | III | N/A | N/A |
| MG717820 | Y217-4  | USA        | Emperor            | unknown | N/A | N/A | III | N/A | N/A |
| MG717821 | Y276-1  | USA        | Otscha Bala        | unknown | N/A | N/A | I   | N/A | N/A |
| MG717822 | Y276-2  | USA        | Otscha Bala        | unknown | N/A | N/A | I   | N/A | N/A |
| MG717823 | Y276-3  | USA        | Otscha Bala        | unknown | N/A | N/A | I   | N/A | N/A |
| MG717824 | Y252-1  | USA        | Koudsi             | unknown | N/A | N/A | III | N/A | N/A |
| MG717825 | Y252-2  | USA        | Koudsi             | unknown | N/A | N/A | III | N/A | N/A |
| MG717826 | Y252-4  | USA        | Koudsi             | unknown | N/A | N/A | III | N/A | N/A |
| MG717827 | A94-1   | USA        | Servant            | unknown | N/A | N/A | III | N/A | N/A |
| MG717828 | A94-2   | USA        | Servant            | unknown | N/A | N/A | II  | N/A | N/A |
| MG717829 | A94-4   | USA        | Servant            | unknown | N/A | N/A | II  | N/A | N/A |
| MG717831 | SA125-2 | Australia  | Cabernet Sauvignon | unknown | N/A | N/A | II  | N/A | N/A |
| MG717832 | SA125-3 | Australia  | Cabernet Sauvignon | unknown | N/A | N/A | II  | N/A | N/A |
| MG717833 | Y258-1  | Azerbaijan | Lilia Bidona       | unknown | N/A | N/A | I   | N/A | N/A |
| KF667501 | IT-BA   | Brazil     | Italia             | unknown | N/A | N/A | I   | N/A | N/A |
| AY340581 | SP      | Brazil     | Niagra rosada.     | unknown | N/A | N/A | I   | N/A | N/A |

|          |                                      |              |                      |         |     |     |     |      |     |
|----------|--------------------------------------|--------------|----------------------|---------|-----|-----|-----|------|-----|
| ON567250 | A1892o                               | Russia       | Vitis vinifera       | unknown | I   | I   | I   | I&II | I   |
| MW309530 | RSA-03-04_Agawam                     | South Africa | Agawam               | unknown | I   | I   | I   | I&II | I   |
| MW309531 | RSA-06-08_Blauer_Limberger           | South Africa | Blauer Limberger     | unknown | I   | I   | I   | I&II | I   |
| MW309532 | RSA-07-15_Cataratto                  | South Africa | Cataratto            | unknown | I   | I   | I   | I&II | I   |
| MW309533 | RSA-09-06_Clairette_Egreneuse        | South Africa | Clairette Egreneuse  | unknown | N/A | III | III | III  | III |
| MW309534 | RSA-10-06_Cornifesto                 | South Africa | Cornifesto           | unknown | I   | I   | I   | I&II | I   |
| MW309535 | RSA-17-07_Kadarka                    | South Africa | Kadarka              | unknown | I   | I   | I   | I&II | I   |
| MW309536 | RSA-18-02_Limberger                  | South Africa | Limberger            | unknown | I   | I   | I   | I&II | I   |
| MW309537 | RSA-20-04_Mourvedre                  | South Africa | Mourvedre            | unknown | III | III | III | III  | III |
| MW309538 | RSA-20-04_Mourvedre_2                | South Africa | Mourvedre            | unknown | I   | I   | I   | I&II | I   |
| MW309539 | RSA-22-15_Mourisco_de_Semente        | South Africa | Mourisco de Semente  | unknown | I   | I   | I   | I&II | I   |
| MW309540 | RSA-23-01_Muscat_d_Alexandrie_b lanc | South Africa | Alexandrie blanc     | unknown | I   | I   | I   | I&II | I   |
| MW309541 | RSA-23-15_Muscat_St_Laurent          | South Africa | Muscat Saint Laurent | unknown | III | III | III | III  | III |
| MW309542 | RSA-26-02_Petit_Sirah_Durif          | South Africa | Petit Sirah          | unknown | I   | I   | I   | I&II | I   |
| MW309543 | RSA-33-06_Teoulrier                  | South Africa | Teoulrier            | unknown | III | III | III | III  | III |

|           |                             |              |                |         |     |     |     |      |     |
|-----------|-----------------------------|--------------|----------------|---------|-----|-----|-----|------|-----|
| MW309544  | strain RSA-33-06_Teoulter_2 | South Africa | Teoulter       | unknown | I   | I   | I   | I&II | I   |
| MW309545  | RSA-33-07_Teroldego         | South Africa | Teroldego      | unknown | III | III | III | III  | III |
| MW309547  | RSA-45-07_Red_Globe_2       | South Africa | Red Globe      | unknown | I   | I   | I   | I&II | I   |
| MW309548  | RSA-48-09_Tinta_Amarela     | South Africa | Tinta Amarela  | unknown | III | III | III | III  | III |
| MW309549  | RSA-48-09_Tinta_Amarela_2   | South Africa | Tinta Amarela  | unknown | I   | I   | I   | I&II | I   |
| MW309551  | RSA-55-01_Staufer           | South Africa | Staufer        | unknown | II  | II  | II  | I&II | II  |
| MZ440717  | 12G456                      | Canada       | Vitis vinifera | unknown | I   | I   | I   | I&II | I   |
| MZ440718  | 12G479A                     | Canada       | Vitis vinifera | unknown | I   | I   | I   | I&II | I   |
| MZ440719  | 2G479B                      | Canada       | Vitis vinifera | unknown | I   | I   | I   | I&II | I   |
| MZ440720  | 12G442                      | Canada       | Vitis vinifera | unknown | III | III | III | III  | III |
| MZ440721  | 12G446                      | Canada       | Vitis vinifera | unknown | III | III | III | III  | III |
| MZ440722  | 12G475                      | Canada       | Vitis vinifera | unknown | I   | I   | I   | I&II | I   |
| NC_018458 | AUD46129                    | USA          | Vitis vinifera | N/A     | N/A | N/A | N/A | N/A  | N/A |

<sup>1</sup>SD = Shiraz disease, LRD = leafroll disease (LRD), SD-affect and SD-negative isolates refer to when grapevines infected with these isolates, they show typical SD symptoms, or they remain asymptomatic [11,32].

<sup>2</sup> I = GVA<sup>I</sup>, II = GVA<sup>II</sup>, III = GVA<sup>III</sup>, phylogroup of GVA by RdRp, MP, CP, RNA-binding genes and complete genome by phylogenetic analysis.

\*Two isolates assigned to different phylogroup when using different gene regions of GVA.

**Table S8.** Details of the Australian grapevine leafroll associate virus 3 (GLRaV-3) isolates generated by metagenomic high-throughput sequencing and the publicly available isolates used for the phylogenetic analysis.

| Phylogroup | % nt identities of CP gene of each phylogroup | Accession no. | Isolate | Country      | Variety            | %nt identity to NY1 <sup>1</sup> |
|------------|-----------------------------------------------|---------------|---------|--------------|--------------------|----------------------------------|
| V          | 74.31-79.83                                   | KY073323      | 8415A   | Canada       | Riesling           | 74.31%                           |
|            |                                               | MH521097      | Cha141  | USA          | Chardonnay         | 76.82%                           |
|            |                                               | KM058745      | GH24    | South Africa | Cabernet Sauvignon | 76.82%                           |
|            |                                               | JX266782      | 3m-139  | Australia    | Sauvignon Blanc    | 76.86%                           |
|            |                                               | KY707826      | NdA121  | Italy        | Nero d'Avola       | 77.88%                           |
|            |                                               | MK032068      | Vdl     | Canada       | Vidal              | 77.92%                           |
|            |                                               | MH521095      | Cha138  | USA          | Chardonnay         | 78.66%                           |
|            |                                               | MH521094      | Cha137  | USA          | Chardonnay         | 78.66%                           |
|            |                                               | KY764332      | Trc139  | USA          | Chardonnay         | 78.66%                           |
|            |                                               | JQ796828      | 3       | USA          | Merlot             | 78.87%                           |
|            |                                               | JQ655296      | GH30    | South Africa | Cabernet Sauvignon | 79.09%                           |
|            |                                               | JQ655295      | GH11    | South Africa | Cabernet Sauvignon | 79.41%                           |
|            |                                               | MH521105      | Gre233  | Germany      | Green Veltliner    | 79.72%                           |
|            |                                               | MH521114      | Mar239  | USA          | Marzemino          | 79.83%                           |
| IV         | 81.1-82.70                                    | MH521098      | Cha246  | USA          | Chardonnay         | 81.10%                           |
|            |                                               | MH521091      | Cab248  | USA          | Cabernet Sauvignon | 81.21%                           |
|            |                                               | MH521117      | Pin244b | USA          | Pinot Noir         | 81.21%                           |
|            |                                               | KY073324      | 8415B   | Canada       | Riesling           | 81.42%                           |

|     |             |          |             |              |                    |        |
|-----|-------------|----------|-------------|--------------|--------------------|--------|
| III | 91.4-91.72  | MH796136 | GLRaV3-ID45 | USA          | Cabernet Sauvignon | 81.42% |
|     |             | KY707824 | Pro95       | USA          | 11184              | 81.53% |
|     |             | KY707825 | Rod96       | Greece       | Roditis            | 81.53% |
|     |             | KY764333 | Trc138      | USA          | Chardonnay         | 81.63% |
|     |             | MH521103 | 245         | USA          | Vitis vinifera     | 81.63% |
|     |             | MH521109 | Kat255b     | Canada       | Katelin            | 82.70% |
|     |             | KY886362 | I-LR101     | USA          | Vitis vinifera     | 91.40% |
|     |             | MF186605 | I-LR101     | USA          | Vitis vinifera     | 91.40% |
|     |             | GQ352633 | PL-20       | South Africa | Vitis sp.          | 91.51% |
|     |             | MH521099 | Cha246b     | USA          | Chardonnay         | 91.61% |
|     |             | MH521100 | Cha247      | USA          | Chardonnay         | 91.61% |
|     |             | MH521118 | Pin249      | USA          | Pinot noir         | 91.61% |
|     |             | JQ423939 | LN          | China        | Venus Seedless     | 91.72% |
|     |             | MF991951 | VB-108      | Croatia      | Babica             | 91.72% |
|     |             | MH521104 | Gor259      | France       | Goron de Bovernier | 91.72% |
| II  | 92.46-92.78 | MH814485 | 12G446      | Canada       | Vitis vinifera     | 92.46% |
|     |             | EU259806 | GP18        | South Africa | Vitis sp.          | 92.46% |
|     |             | MH814483 | 12G438A     | Canada       | Vitis vinifera     | 92.57% |
|     |             | MH521115 | Mer240      | USA          | Merlot             | 92.57% |
|     |             | KY821093 | AK6         | Pakistan     | Sugra one          | 92.57% |
|     |             | MH814487 | 12G456      | Canada       | Vitis vinifera     | 92.68% |
|     |             | KX701860 | ISAB-BR     | Brazil       | Isabel             | 92.68% |
|     |             | KJ174518 |             | Israel       | Vitis sp.          | 92.68% |

|   |             |          |          |              |                         |        |
|---|-------------|----------|----------|--------------|-------------------------|--------|
| I | 94.59-99.47 | MH814486 | 12G448   | Canada       | Vitis vinifera          | 92.78% |
|   |             | GQ352632 | 623      | South Africa | Ruby Cabernet           | 92.78% |
|   |             | KX756668 | TC-BR    | Brazil       | Tardia de Caxias        | 92.78% |
|   |             | MH521102 | 185      | USA          | Vitis vinifera          | 94.59% |
|   |             | MH814488 | 17VT16   | Canada       | Vitis vinifera          | 94.59% |
|   |             | MK988555 | Sau      | China        | Cabernet Sauvignon      | 97.77% |
|   |             | EU344893 | Cl-766   | Chile        | Merlot                  | 99.04% |
|   |             | MH521089 | BHA172   | Spain        | BHAU 19-010             | 99.04% |
|   |             | MH521088 | AU173    | Spain        | AU 33-057               | 99.15% |
|   |             | JX559645 | 3138-07  | Canada       | Vitis vinifera          | 99.15% |
|   |             | MH796135 | ID46     | USA          | Cabernet sauvignon      | 99.15% |
|   |             | MH521110 | Kis24    | Hungary      | Kishmish Vatkana        | 99.15% |
|   |             | MN548393 | SK933    | Slovakia     | Vitis vinifera          | 99.15% |
|   |             | MK804765 | NUB-BR   | Brazil       | Vitis sp. cv. BRS Nubia | 99.15% |
|   |             | KY821094 | SL37-3   | Pakistan     | Italia                  | 99.26% |
|   |             | MH521090 | Bla223   | USA          | Black Muscat Alexandria | 99.26% |
|   |             | GQ352631 | 621      | South Africa | Cabernet Sauvignon      | 99.26% |
|   |             | MH521101 | Dk256    | USA          | DK03                    | 99.26% |
|   |             | OP752692 | Cabw2_N1 | Australia    | Cabernet Sauvignon      | 99.26% |
|   |             | OP752684 | Cabw1_N2 | Australia    | Cabernet Sauvignon      | 99.26% |
|   |             | MH814484 | 12G445   | Canada       | Vitis vinifera          | 99.26% |
|   |             | MH814489 | 14G462   | Canada       | Vitis vinifera          | 99.26% |
|   |             | MH521096 | Cha138b  | USA          | Chardonnay              | 99.36% |

|          |            |           |                    |        |
|----------|------------|-----------|--------------------|--------|
| KX756669 | TRAJ-BR    | Brazil    | Trajadura          | 99.36% |
| MH521092 | Cha103     | USA       | Chardonnay         | 99.36% |
| MH521111 | Kis252     | Hungary   | Kishmish Vatkana   | 99.36% |
| MH521093 | Cha106     | USA       | Chardonnay         | 99.36% |
| MH521119 | Tou260     | Portugal  | Touriga Franca     | 99.36% |
| MH814491 | 14G466     | Canada    | Vitis vinifera     | 99.36% |
| MH521112 | LN3204     | USA       | LN33               | 99.36% |
| MH521106 | Ita218     | USA       | Italia             | 99.36% |
| MH521107 | Ita219     | USA       | Italia             | 99.36% |
| OP752688 | Merlot1_N5 | Australia | Merlot             | 99.36% |
| OP752695 | WIL47_N4   | Australia | Shiraz             | 99.36% |
| OP752680 | WIL53_N4   | Australia | Shiraz             | 99.36% |
| OP752698 | WIL48_N4   | Australia | Shiraz             | 99.36% |
| OP752693 | WIL49_N5   | Australia | Shiraz             | 99.36% |
| OP752690 | WIL12_N3   | Australia | Shiraz             | 99.36% |
| OP752683 | WIL5_N4    | Australia | Shiraz             | 99.36% |
| OP752678 | WIL6_N4    | Australia | Shiraz             | 99.36% |
| OP752682 | WIL7_N5    | Australia | Shiraz             | 99.36% |
| OP752687 | WIL4_N4    | Australia | Shiraz             | 99.36% |
| OP752681 | WIL8_N4    | Australia | Shiraz             | 99.36% |
| OP752685 | WIL10_N4   | Australia | Shiraz             | 99.36% |
| OP752689 | WIL9_N3    | Australia | Shiraz             | 99.36% |
| OP752691 | WIL50_N4   | Australia | Shiraz             | 99.36% |
| OP752686 | Cabw11_N3  | Australia | Cabernet Sauvignon | 99.36% |
| OP752696 | WIL14_N4   | Australia | Shiraz             | 99.36% |

|          |              |           |                    |        |
|----------|--------------|-----------|--------------------|--------|
| OP752677 | WIL15_N4     | Australia | Shiraz             | 99.36% |
| OP752679 | Cabw12_N4    | Australia | Cabernet Sauvignon | 99.36% |
| MH814482 | 12G402       | Canada    | Vitis vinifera     | 99.47% |
| GU983863 | WAMR         | USA       | Merlot             | 99.47% |
| MH521108 | Kat255       | Canada    | Katelin            | 99.47% |
| MH521116 | Pin244       | USA       | Pinot Noir         | 99.47% |
| MH814490 | 14G463       | Canada    | Vitis vinifera     | 99.47% |
| MH521113 | Mal162       | USA       | Malbec             | 99.47% |
| OP752630 | WIL11_N43    | Australia | Shiraz             | 99.68% |
| JQ023131 | GLRaV-1_1050 | Canada    | Vitis sp.          | N/A    |

<sup>1</sup> Pairwise nucleotide identity of coat protein gene to the exemplar isolate NY1 (AF037268).

**Table S9.** Pairwise amino acid similarity of grapevine leafroll-associated virus 4 (GLRaV-4) to the exemplar isolate LR106 (GLRaV-4 strain 4, accession no. FJ467503).

| GenBank accession No. | Isolate names | Strain of GLRaV-4 | Country     | Variety      | % aa similarity of RdRp <sup>1</sup> to LR106 | % aa similarity of HSP70h <sup>1</sup> to LR106 | % aa similarity of CP <sup>1</sup> to LR106 |
|-----------------------|---------------|-------------------|-------------|--------------|-----------------------------------------------|-------------------------------------------------|---------------------------------------------|
| KP313764              | Ob            | unclassified      | Switzerland | Otcha bala   | 72.54                                         | 70.6                                            | 74.63                                       |
| FJ907331              | Carnelian     |                   | USA         | Carnelian    | N/A                                           | 66.73                                           | 77.94                                       |
| AM182328              | Pr            |                   | Greece      | Mantilaria   | 81.47                                         | N/A                                             | N/A                                         |
| KY940817              | SW27-1        | 10                | Pakistan    | Tarakya      | 82.05                                         | 78.09                                           | 77.01                                       |
| FJ467503              | LR106         | 4                 | USA         | Vitis sp.    | 100                                           | 100                                             | 100                                         |
| KY821095              | LH3           |                   | Pakistan    | Autumn Royal | 95.75                                         | 99.81                                           | 99.26                                       |

|          |          |   |           |                    |       |       |       |
|----------|----------|---|-----------|--------------------|-------|-------|-------|
| MF669483 | WAMR-4   | 9 | USA       | Merlot             | 95.75 | 99.63 | 99.63 |
| AY297819 | -        |   | USA       | Vitis sp.          | N/A   | 82.02 | 81.39 |
| KJ810572 | Man086   |   | Spain     | Mantua             | 86.87 | 82.02 | 81.75 |
| MF669482 | WALA-9   |   | USA       | Lagrein            | 87.26 | 82.21 | 82.48 |
| OP752673 | Cabw2_N6 |   | Australia | Cabernet Sauvignon | 87.04 | 81.65 | 82.12 |
| OP752652 | LC10_N6  |   | Australia | Shiraz             | 87.04 | 81.65 | 82.12 |
| OP752665 | LC12_N5  |   | Australia | Shiraz             | 87.04 | 81.65 | 81.75 |
| OP752651 | LC11_N6  |   | Australia | Shiraz             | 87.04 | 81.65 | 81.75 |
| OP752643 | LC13_N3  |   | Australia | Shiraz             | 87.23 | 81.27 | 82.48 |
| OP752676 | LC5_N5   |   | Australia | Shiraz             | 87.23 | 81.27 | 82.48 |
| OP752645 | LC6_N6   |   | Australia | Shiraz             | 87.23 | 81.27 | 82.48 |
| OP752646 | LC7_N6   |   | Australia | Shiraz             | 87.23 | 81.27 | 82.48 |
| OQ092720 | LC1_N4   |   | Australia | Shiraz             | 87.23 | 81.27 | 82.48 |
| OP752675 | LC9_N5   |   | Australia | Shiraz             | 87.23 | 81.27 | 82.48 |
| OP752670 | LC14_N6  |   | Australia | Shiraz             | 87.23 | 81.27 | 82.48 |
| OP752660 | WIL9_N5  |   | Australia | Shiraz             | 86.85 | 81.65 | 81.39 |
| OP752650 | WIL10_N7 |   | Australia | Shiraz             | 86.85 | 81.65 | 81.39 |

|          |                |   |               |                       |       |       |       |
|----------|----------------|---|---------------|-----------------------|-------|-------|-------|
| OP752666 | WIL8_N7        | 6 | Austral<br>ia | Shiraz                | 86.85 | 81.65 | 81.39 |
| OP752647 | Cabw12_<br>N7  |   | Austral<br>ia | Cabernet<br>Sauvignon | 87.04 | 81.46 | 82.12 |
| OP752657 | WIL12_N6       |   | Austral<br>ia | Shiraz                | 87.04 | 81.46 | 82.12 |
| OQ092719 | WIL11_N7       |   | Austral<br>ia | Shiraz                | 87.04 | 81.46 | 82.12 |
| OP752659 | Cabw11_<br>N31 |   | Austral<br>ia | Cabernet<br>Sauvignon | 87.04 | 81.46 | 82.12 |
| OP752653 | WIL13_N6       |   | Austral<br>ia | Shiraz                | 87.04 | 81.46 | 82.12 |
| OP752644 | WIL7_N6        |   | Austral<br>ia | Shiraz                | 86.85 | 81.27 | 81.75 |
| OP752668 | WIL5_N7        |   | Austral<br>ia | Shiraz                | 87.23 | 81.46 | 82.12 |
| OP752674 | WIL6_N6        |   | Austral<br>ia | Shiraz                | 87.23 | 81.46 | 82.12 |
| OP752648 | WIL4_N6        |   | Austral<br>ia | Shiraz                | 87.23 | 81.46 | 82.12 |
| OP752658 | WIL1_N15       |   | Austral<br>ia | Shiraz                | 86.85 | 81.46 | 82.12 |
| OP752669 | WIL3_N6        |   | Austral<br>ia | Shiraz                | 87.04 | 81.46 | 82.48 |
| OP752655 | WIL2_N7        |   | Austral<br>ia | Shiraz                | 87.04 | 81.46 | 82.48 |
| OP752654 | WIL10_N6       |   | Austral<br>ia | Shiraz                | 85.49 | 81.09 | 80.29 |
| OP752661 | WIL12_N5       |   | Austral<br>ia | Shiraz                | 85.49 | 81.09 | 80.29 |
| OP752672 | WIL11_N6       |   | Austral<br>ia | Shiraz                | 85.3  | 81.09 | 80.29 |

|          |          |              |               |                    |       |       |       |
|----------|----------|--------------|---------------|--------------------|-------|-------|-------|
| OP752663 | WIL19_N6 | 5            | Austral<br>ia | Shiraz             | 85.49 | 81.27 | 80.29 |
| OP752649 | WIL22_N5 |              | Austral<br>ia | Shiraz             | 85.3  | 81.27 | 80.29 |
| OP752662 | WIL24_N5 |              | Austral<br>ia | Shiraz             | 85.3  | 81.27 | 80.29 |
| OP752664 | WIL14_N5 |              | Austral<br>ia | Shiraz             | 85.49 | 81.27 | 80.66 |
| OP752656 | WIL15_N6 |              | Austral<br>ia | Shiraz             | 85.49 | 81.27 | 80.66 |
| FJ467504 | Estellat |              | USA           | Vitis sp.          | 86.68 | 78.28 | 79.93 |
| OP752671 | WIL15_N8 |              | Austral<br>ia | Shiraz             | 86.85 | 81.27 | 82.12 |
| OP752667 | WIL13_N7 |              | Austral<br>ia | Shiraz             | 86.85 | 81.27 | 82.12 |
| KY940818 | LH3-1    |              | Pakista<br>n  | Autumn<br>Royal    | 85.91 | 82.02 | 81.75 |
| FR822696 | Y217     |              | France        | White<br>Emperor   | 85.71 | 82.02 | 82.12 |
| JX559639 | 3138-03  |              | Canada        | Vitis vinifera     | 85.71 | 82.21 | 82.12 |
| KX828702 | TRAJ1-BR |              | Brazil        | Trajadura          | 86.68 | 82.02 | 83.21 |
| MF669481 | WASB-5   |              | USA           | Sauvignon<br>Blanc | 85.91 | 82.21 | 82.12 |
| JX513893 | 1050-02  |              | Canada        | Vitis vinifera     | 85.91 | 82.4  | 81.75 |
| KY940819 | Bt26     |              | Pakista<br>n  | Flame<br>Seedless  | 86.49 | 82.02 | 81.02 |
| AF414119 | PMWaV-1  | Out<br>group | USA           | unknown            | N/A   | N/A   | N/A   |

<sup>1</sup> RdRp = RNA-dependent RNA polymerase (RdRp), HSP70h = heat shock protein 70 homologue, CP = coat protein

<sup>2</sup> Strains classified based on phylogenetic analysis of GLRaV-4 (Figure 5).

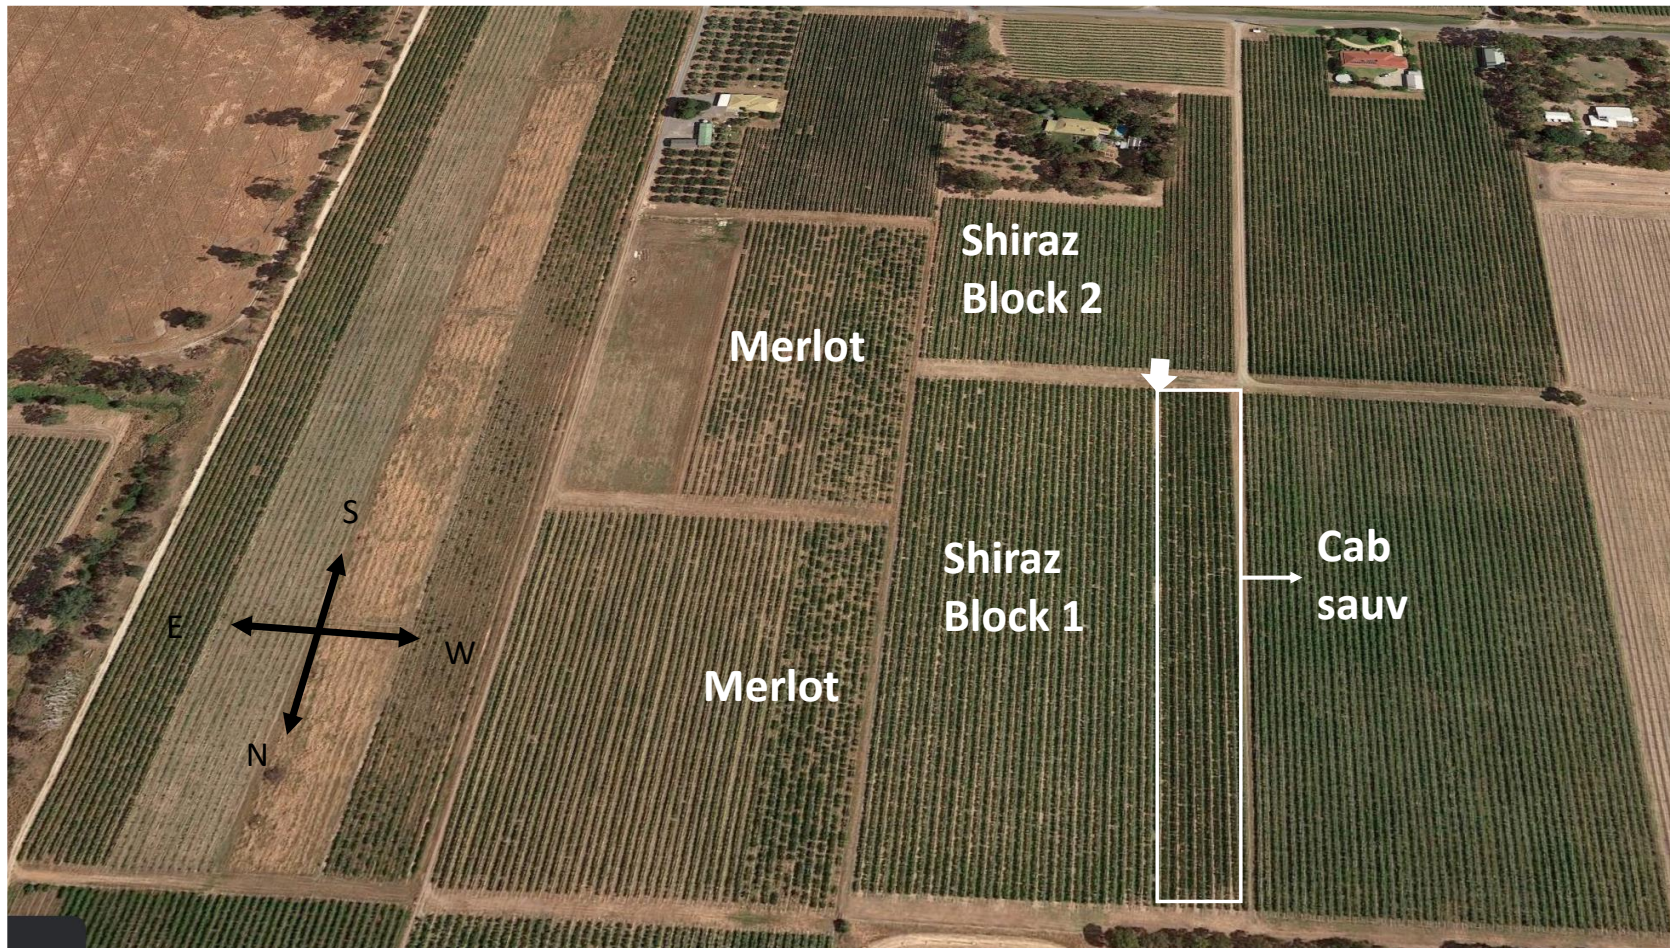

**Figure S1.** Vineyard map of the Willunga site. Shiraz grapevines from blocks 1 and 2 were used in the Metagenomic High Throughput Sequencing (Meta-HTS) and RT-PCR virus detection. The red arrow indicates Row 35 where symptoms of Shiraz disease (SD) were first discovered.



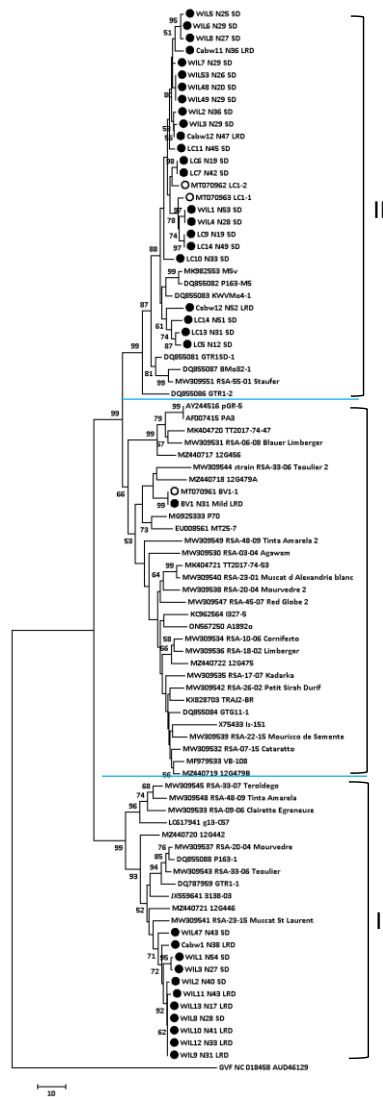

(a)

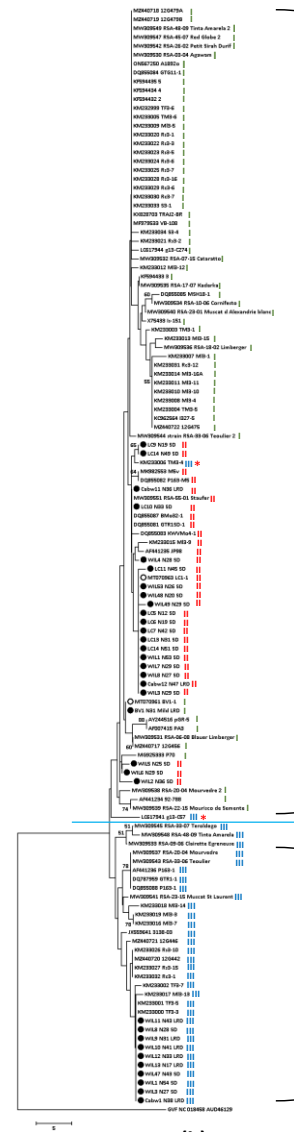

(b)

**Figure S2.** Neighbor-joining phylogenetic analysis of amino acid (aa) sequences and sequences of full-length movement protein (MP) and RNA-binding (RB) genes of grapevine virus A (GVA) using metagenomic sequences and sequences from GenBank. (a) A neighbour-joining tree using full-length aa sequences of MP gene, (b) using complete aa sequences of CP gene. The phylogenetic trees were constructed using MEGA (7.0.26) software and the neighbour-joining method with 1000 bootstrap replicates. Only bootstrap values higher than 50% were shown. Sequences generated by the MiSeq and NovaSeq Meta-HTS experiments were labelled using circles and black dots, respectively. The variety, accession numbers and phylogroups assigned by each gene are listed in Table S6. Grapevine virus F (GVF) isolate AUD46129 (accession no. NC018458) was used as an outgroup. The phylogroup assigned by each gene was different for the two isolates (marked by \*) in figure (b) and detailed in Table S6.

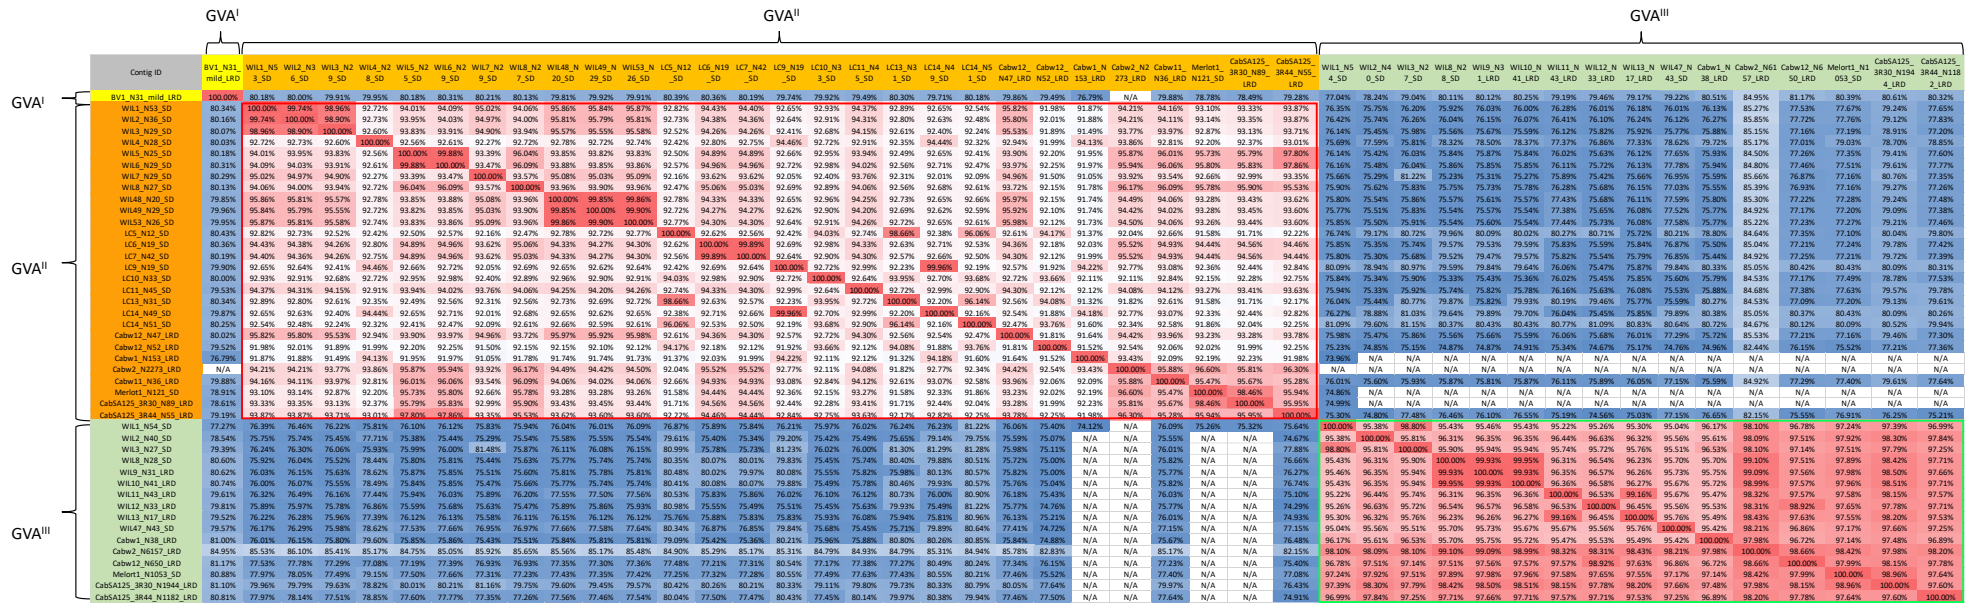

**Figure S3.** Color coded percentage of nucleotide (nt) pairwise identities of grapevine virus A (GVA) contigs in this study. GVA isolates from phylogenetic groups I, II and III are labeled as GVA<sup>I</sup>, GVA<sup>II</sup> and GVA<sup>III</sup>. The contig IDs refer to Table S6. The pairwise identities were obtained by the the “blastn” function of Blast+. For contigs which do not share any comment genome region, identities are shown as N/A. The percentage of nt identities are color coded by the “3- color scale function” of Microsoft excel using blue (lowest value), white (midpoint) and red (highest value). The red and green squares show the sequence differences of GVA<sup>II</sup> and GVA<sup>III</sup> isolates between cv. Shiraz, Merlot and Cabernet Sauvignon, respectively.
